# Supplementary material for: Sleep Traits Causally Affect the Brain Cortical Structure: A Mendelian Randomization Study
Source: MDPI journal article supplement (doi:10.3390/biomedicines11082296), 2023-08-18
Supplement: s1 [file s1]

| The details of genetic instruments predicting short sleep and cortical SA/TH |                  |            |                 |             |                |            |               |             |                   |    |              |                |              |      |
|------------------------------------------------------------------------------|------------------|------------|-----------------|-------------|----------------|------------|---------------|-------------|-------------------|----|--------------|----------------|--------------|------|
| cortical<br>SA/TH                                                            | Exposure         | SNP        | EA.exposur<br>e | OA.exposure | EA.outcom<br>e | OA.outcome | beta.exposure | se.exposure | pval.exposur<br>e | F  | beta.outcome | se.outcom<br>e | pval.outcome | EAF  |
| TH                                                                           | frontalpole      | rs11763750 | G               | A           | G              | A          | 0.0072        | 0.0012      | 5.10E-09          | 34 | -0.0032      | 0.0025         | 0.2002       | 0.81 |
| TH                                                                           | frontalpole      | rs1229762  | C               | T           | C              | T          | -0.0072       | 0.0010      | 1.00E-12          | 51 | 0.0014       | 0.0021         | 0.5191       | 0.34 |
| TH                                                                           | frontalpole      | rs12518468 | T               | C           | T              | C          | -0.0059       | 0.0010      | 8.50E-09          | 33 | 0.0013       | 0.0022         | 0.5426       | 0.67 |
| TH                                                                           | frontalpole      | rs12567114 | G               | A           | G              | A          | 0.0063        | 0.0011      | 4.10E-09          | 34 | -0.0013      | 0.0023         | 0.5660       | 0.72 |
| TH                                                                           | frontalpole      | rs12661667 | C               | T           | C              | T          | -0.0060       | 0.0011      | 2.80E-08          | 31 | 0.0005       | 0.0023         | 0.8202       | 0.74 |
| TH                                                                           | frontalpole      | rs13107325 | C               | T           | C              | T          | -0.0133       | 0.0018      | 2.50E-13          | 53 | 0.0017       | 0.0042         | 0.6882       | 0.93 |
| TH                                                                           | frontalpole      | rs1380703  | A               | G           | A              | G          | -0.0068       | 0.0010      | 1.60E-11          | 45 | -0.0019      | 0.0022         | 0.3826       | 0.62 |
| TH                                                                           | frontalpole      | rs1607227  | G               | T           | G              | T          | 0.0064        | 0.0011      | 1.50E-09          | 36 | 0.0015       | 0.0023         | 0.4995       | 0.70 |
| TH                                                                           | frontalpole      | rs17005118 | G               | A           | G              | A          | -0.0065       | 0.0011      | 2.50E-09          | 36 | 0.0008       | 0.0023         | 0.7364       | 0.74 |
| TH                                                                           | frontalpole      | rs17388803 | A               | C           | A              | C          | -0.0098       | 0.0016      | 6.50E-10          | 38 | 0.0012       | 0.0032         | 0.7142       | 0.89 |
| TH                                                                           | frontalpole      | rs2014830  | C               | T           | C              | T          | 0.0058        | 0.0011      | 2.70E-08          | 30 | -0.0002      | 0.0022         | 0.9373       | 0.70 |
| TH                                                                           | frontalpole      | rs205024   | C               | T           | C              | T          | 0.0055        | 0.0010      | 2.70E-08          | 31 | 0.0014       | 0.0020         | 0.4901       | 0.62 |
| TH                                                                           | frontalpole      | rs2820313  | A               | G           | A              | G          | -0.0060       | 0.0010      | 2.30E-09          | 35 | 0.0035       | 0.0021         | 0.0974       | 0.66 |
| TH                                                                           | frontalpole      | rs2863957  | C               | A           | C              | A          | 0.0102        | 0.0012      | 2.60E-18          | 77 | -0.0058      | 0.0024         | 0.0174       | 0.78 |
| TH                                                                           | frontalpole      | rs3776864  | A               | C           | A              | C          | 0.0057        | 0.0010      | 1.70E-08          | 32 | -0.0028      | 0.0022         | 0.2162       | 0.67 |
| TH                                                                           | frontalpole      | rs4585442  | A               | G           | A              | G          | -0.0063       | 0.0010      | 8.10E-10          | 38 | 0.0051       | 0.0022         | 0.0196       | 0.69 |
| TH                                                                           | frontalpole      | rs5757675  | G               | T           | G              | T          | 0.0065        | 0.0011      | 2.70E-09          | 34 | -0.0001      | 0.0023         | 0.9823       | 0.26 |
| TH                                                                           | frontalpole      | rs59779556 | T               | G           | T              | G          | 0.0055        | 0.0010      | 2.00E-08          | 32 | -0.0004      | 0.0020         | 0.8439       | 0.55 |
| TH                                                                           | frontalpole      | rs7524118  | T               | C           | T              | C          | -0.0058       | 0.0011      | 4.90E-08          | 30 | 0.0011       | 0.0022         | 0.6087       | 0.29 |
| TH                                                                           | frontalpole      | rs9321171  | C               | T           | C              | T          | 0.0054        | 0.0010      | 4.20E-08          | 31 | 0.0024       | 0.0020         | 0.2420       | 0.54 |
| SA                                                                           | inferiorparietal | rs11763750 | G               | A           | G              | A          | 0.0072        | 0.0012      | 5.10E-09          | 34 | 2.9415       | 4.7741         | 0.5378       | 0.81 |
| SA                                                                           | inferiorparietal | rs1229762  | C               | T           | C              | T          | -0.0072       | 0.0010      | 1.00E-12          | 51 | 8.7219       | 4.1375         | 0.0350       | 0.34 |

|    |                  |            |   |   |   |   |         |        |          |    |         |        |        |      |
|----|------------------|------------|---|---|---|---|---------|--------|----------|----|---------|--------|--------|------|
| SA | inferiorparietal | rs12518468 | T | C | T | C | -0.0059 | 0.0010 | 8.50E-09 | 33 | 2.0346  | 4.2059 | 0.6286 | 0.67 |
| SA | inferiorparietal | rs12567114 | G | A | G | A | 0.0063  | 0.0011 | 4.10E-09 | 34 | -1.8447 | 4.4771 | 0.6803 | 0.72 |
| SA | inferiorparietal | rs12661667 | C | T | C | T | -0.0060 | 0.0011 | 2.80E-08 | 31 | 2.1440  | 4.3749 | 0.6241 | 0.74 |
| SA | inferiorparietal | rs13107325 | C | T | C | T | -0.0133 | 0.0018 | 2.50E-13 | 53 | 20.8837 | 8.0238 | 0.0092 | 0.93 |
| SA | inferiorparietal | rs1380703  | A | G | A | G | -0.0068 | 0.0010 | 1.60E-11 | 45 | -3.7113 | 4.2039 | 0.3773 | 0.62 |
| SA | inferiorparietal | rs1607227  | G | T | G | T | 0.0064  | 0.0011 | 1.50E-09 | 36 | -4.0498 | 4.3661 | 0.3536 | 0.70 |
| SA | inferiorparietal | rs17005118 | G | A | G | A | -0.0065 | 0.0011 | 2.50E-09 | 36 | 1.6572  | 4.3513 | 0.7033 | 0.74 |
| SA | inferiorparietal | rs17388803 | A | C | A | C | -0.0098 | 0.0016 | 6.50E-10 | 38 | -1.9416 | 6.2492 | 0.7560 | 0.89 |
| SA | inferiorparietal | rs2014830  | C | T | C | T | 0.0058  | 0.0011 | 2.70E-08 | 30 | -8.8896 | 4.2629 | 0.0370 | 0.70 |
| SA | inferiorparietal | rs205024   | C | T | C | T | 0.0055  | 0.0010 | 2.70E-08 | 31 | -0.6230 | 3.8823 | 0.8725 | 0.62 |
| SA | inferiorparietal | rs2820313  | A | G | A | G | -0.0060 | 0.0010 | 2.30E-09 | 35 | -0.5026 | 4.0569 | 0.9014 | 0.66 |
| SA | inferiorparietal | rs2863957  | C | A | C | A | 0.0102  | 0.0012 | 2.60E-18 | 77 | -3.7439 | 4.7266 | 0.4283 | 0.78 |
| SA | inferiorparietal | rs3776864  | A | C | A | C | 0.0057  | 0.0010 | 1.70E-08 | 32 | 3.4046  | 4.3045 | 0.4290 | 0.67 |
| SA | inferiorparietal | rs4585442  | A | G | A | G | -0.0063 | 0.0010 | 8.10E-10 | 38 | 0.9440  | 4.2129 | 0.8227 | 0.69 |
| SA | inferiorparietal | rs5757675  | G | T | G | T | 0.0065  | 0.0011 | 2.70E-09 | 34 | -4.1812 | 4.3906 | 0.3409 | 0.26 |
| SA | inferiorparietal | rs59779556 | T | G | T | G | 0.0055  | 0.0010 | 2.00E-08 | 32 | -4.1927 | 3.8654 | 0.2781 | 0.55 |
| SA | inferiorparietal | rs7524118  | T | C | T | C | -0.0058 | 0.0011 | 4.90E-08 | 30 | -0.5696 | 4.2115 | 0.8924 | 0.29 |
| SA | inferiorparietal | rs9321171  | C | T | C | T | 0.0054  | 0.0010 | 4.20E-08 | 31 | 1.3536  | 3.9127 | 0.7294 | 0.54 |
| SA | lateraloccipital | rs11763750 | G | A | G | A | 0.0072  | 0.0012 | 5.10E-09 | 34 | -1.3403 | 4.2208 | 0.7508 | 0.81 |
| SA | lateraloccipital | rs1229762  | C | T | C | T | -0.0072 | 0.0010 | 1.00E-12 | 51 | -3.4818 | 3.6502 | 0.3402 | 0.34 |
| SA | lateraloccipital | rs12518468 | T | C | T | C | -0.0059 | 0.0010 | 8.50E-09 | 33 | 2.6735  | 3.7229 | 0.4727 | 0.67 |
| SA | lateraloccipital | rs12661667 | C | T | C | T | -0.0060 | 0.0011 | 2.80E-08 | 31 | -5.6549 | 3.8692 | 0.1439 | 0.74 |
| SA | lateraloccipital | rs12963463 | C | T | C | T | 0.0071  | 0.0011 | 1.90E-11 | 45 | 3.0734  | 3.8666 | 0.4267 | 0.30 |
| SA | lateraloccipital | rs13107325 | C | T | C | T | -0.0133 | 0.0018 | 2.50E-13 | 53 | -8.3266 | 7.1156 | 0.2419 | 0.93 |
| SA | lateraloccipital | rs1380703  | A | G | A | G | -0.0068 | 0.0010 | 1.60E-11 | 45 | -6.0516 | 3.7097 | 0.1028 | 0.62 |

|    |                  |            |   |   |   |   |         |         |          |    |         |        |        |      |
|----|------------------|------------|---|---|---|---|---------|---------|----------|----|---------|--------|--------|------|
| SA | lateraloccipital | rs1607227  | G | T | G | T | 0.0064  | 0.0011  | 1.50E-09 | 36 | 8.5572  | 3.8564 | 0.0265 | 0.70 |
| SA | lateraloccipital | rs17005118 | G | A | G | A | -0.0065 | 0.0011  | 2.50E-09 | 36 | -5.7842 | 3.8552 | 0.1335 | 0.74 |
| SA | lateraloccipital | rs205024   | C | T | C | T | 0.0055  | 0.0010  | 2.70E-08 | 31 | -2.3272 | 3.4286 | 0.4973 | 0.62 |
| SA | lateraloccipital | rs2820313  | A | G | A | G | -0.0060 | 0.0010  | 2.30E-09 | 35 | 3.5288  | 3.5863 | 0.3251 | 0.66 |
| SA | lateraloccipital | rs2863957  | C | A | C | A | 0.0102  | 0.0012  | 2.60E-18 | 77 | 2.2826  | 4.1749 | 0.5846 | 0.78 |
| SA | lateraloccipital | rs3776864  | A | C | A | C | 0.0057  | 0.0010  | 1.70E-08 | 32 | 7.1127  | 3.8129 | 0.0621 | 0.67 |
| SA | lateraloccipital | rs4585442  | A | G | A | G | -0.0063 | 0.0010  | 8.10E-10 | 38 | -7.5930 | 3.7285 | 0.0417 | 0.69 |
| SA | lateraloccipital | rs5757675  | G | T | G | T | 0.0065  | 0.0011  | 2.70E-09 | 34 | 0.3999  | 3.8763 | 0.9178 | 0.26 |
| SA | lateraloccipital | rs7524118  | T | C | T | C | -0.0058 | 0.0011  | 4.90E-08 | 30 | 2.3285  | 3.7311 | 0.5326 | 0.29 |
| SA | lateraloccipital | rs9321171  | C | T | C | T | 0.0054  | 0.0010  | 4.20E-08 | 31 | 2.1689  | 3.4569 | 0.5304 | 0.54 |
| SA | middletemporal   | rs11763750 | G | A | G | A | 0.0072  | 0.1705  | 5.10E-09 | 34 | 0.1705  | 2.7406 | 0.9504 | 0.81 |
| SA | middletemporal   | rs12518468 | T | C | T | C | -0.0059 | -3.1308 | 8.50E-09 | 33 | -3.1308 | 2.4134 | 0.1945 | 0.67 |
| SA | middletemporal   | rs12567114 | G | A | G | A | 0.0063  | -0.6639 | 4.10E-09 | 34 | -0.6639 | 2.5656 | 0.7958 | 0.72 |
| SA | middletemporal   | rs12661667 | C | T | C | T | -0.0060 | -1.7562 | 2.80E-08 | 31 | -1.7562 | 2.5216 | 0.4861 | 0.74 |
| SA | middletemporal   | rs1380703  | A | G | A | G | -0.0068 | -3.6311 | 1.60E-11 | 45 | -3.6311 | 2.3988 | 0.1301 | 0.62 |
| SA | middletemporal   | rs1607227  | G | T | G | T | 0.0064  | 1.9918  | 1.50E-09 | 36 | 1.9918  | 2.5037 | 0.4263 | 0.70 |
| SA | middletemporal   | rs17005118 | G | A | G | A | -0.0065 | -1.1678 | 2.50E-09 | 36 | -1.1678 | 2.5013 | 0.6406 | 0.74 |
| SA | middletemporal   | rs17388803 | A | C | A | C | -0.0098 | -1.9838 | 6.50E-10 | 38 | -1.9838 | 3.5725 | 0.5787 | 0.89 |
| SA | middletemporal   | rs205024   | C | T | C | T | 0.0055  | 1.3856  | 2.70E-08 | 31 | 1.3856  | 2.2292 | 0.5342 | 0.62 |
| SA | middletemporal   | rs2820313  | A | G | A | G | -0.0060 | -3.7174 | 2.30E-09 | 35 | -3.7174 | 2.3275 | 0.1102 | 0.66 |
| SA | middletemporal   | rs2863957  | C | A | C | A | 0.0102  | 3.1638  | 2.60E-18 | 77 | 3.1638  | 2.7177 | 0.2444 | 0.78 |
| SA | middletemporal   | rs3776864  | A | C | A | C | 0.0057  | 2.4144  | 1.70E-08 | 32 | 2.4144  | 2.4742 | 0.3291 | 0.67 |
| SA | middletemporal   | rs5757675  | G | T | G | T | 0.0065  | 2.5131  | 2.70E-09 | 34 | 2.5131  | 2.5232 | 0.3192 | 0.26 |
| SA | middletemporal   | rs59779556 | T | G | T | G | 0.0055  | -1.0092 | 2.00E-08 | 32 | -1.0092 | 2.2156 | 0.6488 | 0.55 |
| SA | middletemporal   | rs7524118  | T | C | T | C | -0.0058 | 0.4566  | 4.90E-08 | 30 | 0.4566  | 2.4198 | 0.8503 | 0.29 |

|    |                |            |   |   |   |   |         |         |          |    |         |        |        |      |
|----|----------------|------------|---|---|---|---|---------|---------|----------|----|---------|--------|--------|------|
| SA | middletemporal | rs9321171  | C | T | C | T | 0.0054  | -4.3881 | 4.20E-08 | 31 | -4.3881 | 2.2382 | 0.0499 | 0.54 |
| TH | middletemporal | rs11763750 | G | A | G | A | 0.0072  | 0.0005  | 5.10E-09 | 34 | 0.0005  | 0.0012 | 0.6692 | 0.81 |
| TH | middletemporal | rs1229762  | C | T | C | T | -0.0072 | -0.0013 | 1.00E-12 | 51 | -0.0013 | 0.0010 | 0.2066 | 0.34 |
| TH | middletemporal | rs12518468 | T | C | T | C | -0.0059 | 0.0010  | 8.50E-09 | 33 | 0.0010  | 0.0010 | 0.3226 | 0.67 |
| TH | middletemporal | rs12661667 | C | T | C | T | -0.0060 | -0.0022 | 2.80E-08 | 31 | -0.0022 | 0.0011 | 0.0369 | 0.74 |
| TH | middletemporal | rs13107325 | C | T | C | T | -0.0133 | -0.0047 | 2.50E-13 | 53 | -0.0047 | 0.0020 | 0.0154 | 0.93 |
| TH | middletemporal | rs1380703  | A | G | A | G | -0.0068 | -0.0003 | 1.60E-11 | 45 | -0.0003 | 0.0010 | 0.7776 | 0.62 |
| TH | middletemporal | rs1607227  | G | T | G | T | 0.0064  | 0.0010  | 1.50E-09 | 36 | 0.0010  | 0.0011 | 0.3628 | 0.70 |
| TH | middletemporal | rs17005118 | G | A | G | A | -0.0065 | -0.0017 | 2.50E-09 | 36 | -0.0017 | 0.0011 | 0.1101 | 0.74 |
| TH | middletemporal | rs17388803 | A | C | A | C | -0.0098 | -0.0012 | 6.50E-10 | 38 | -0.0012 | 0.0015 | 0.4118 | 0.89 |
| TH | middletemporal | rs2014830  | C | T | C | T | 0.0058  | 0.0006  | 2.70E-08 | 30 | 0.0006  | 0.0010 | 0.5676 | 0.70 |
| TH | middletemporal | rs205024   | C | T | C | T | 0.0055  | 0.0013  | 2.70E-08 | 31 | 0.0013  | 0.0009 | 0.1553 | 0.62 |
| TH | middletemporal | rs2820313  | A | G | A | G | -0.0060 | -0.0011 | 2.30E-09 | 35 | -0.0011 | 0.0010 | 0.2768 | 0.66 |
| TH | middletemporal | rs2863957  | C | A | C | A | 0.0102  | 0.0001  | 2.60E-18 | 77 | 0.0001  | 0.0012 | 0.9242 | 0.78 |
| TH | middletemporal | rs3776864  | A | C | A | C | 0.0057  | -0.0012 | 1.70E-08 | 32 | -0.0012 | 0.0011 | 0.2500 | 0.67 |
| TH | middletemporal | rs5757675  | G | T | G | T | 0.0065  | 0.0012  | 2.70E-09 | 34 | 0.0012  | 0.0011 | 0.2545 | 0.26 |
| TH | middletemporal | rs59779556 | T | G | T | G | 0.0055  | -0.0004 | 2.00E-08 | 32 | -0.0004 | 0.0009 | 0.6393 | 0.55 |
| TH | middletemporal | rs7524118  | T | C | T | C | -0.0058 | -0.0015 | 4.90E-08 | 30 | -0.0015 | 0.0010 | 0.1492 | 0.29 |
| TH | paracentral    | rs11763750 | G | A | G | A | 0.0072  | 0.0012  | 5.10E-09 | 34 | -0.0002 | 0.0012 | 0.8760 | 0.81 |
| TH | paracentral    | rs1229762  | C | T | C | T | -0.0072 | 0.0010  | 1.00E-12 | 51 | 0.0024  | 0.0010 | 0.0200 | 0.34 |
| TH | paracentral    | rs12518468 | T | C | T | C | -0.0059 | 0.0010  | 8.50E-09 | 33 | -0.0003 | 0.0010 | 0.7953 | 0.67 |
| TH | paracentral    | rs12661667 | C | T | C | T | -0.0060 | 0.0011  | 2.80E-08 | 31 | -0.0007 | 0.0011 | 0.5225 | 0.74 |
| TH | paracentral    | rs12963463 | C | T | C | T | 0.0071  | 0.0011  | 1.90E-11 | 45 | -0.0014 | 0.0011 | 0.1951 | 0.30 |
| TH | paracentral    | rs1380703  | A | G | A | G | -0.0068 | 0.0010  | 1.60E-11 | 45 | 0.0002  | 0.0011 | 0.8800 | 0.62 |
| TH | paracentral    | rs17005118 | G | A | G | A | -0.0065 | 0.0011  | 2.50E-09 | 36 | 0.0016  | 0.0011 | 0.1414 | 0.74 |

|    |                 |            |   |   |   |   |         |        |          |    |         |        |        |       |
|----|-----------------|------------|---|---|---|---|---------|--------|----------|----|---------|--------|--------|-------|
| TH | paracentral     | rs17388803 | A | C | A | C | -0.0098 | 0.0016 | 6.50E-10 | 38 | 0.0024  | 0.0016 | 0.1302 | 0.89  |
| TH | paracentral     | rs2014830  | C | T | C | T | 0.0058  | 0.0011 | 2.70E-08 | 30 | -0.0009 | 0.0011 | 0.4037 | 0.70  |
| TH | paracentral     | rs205024   | C | T | C | T | 0.0055  | 0.0010 | 2.70E-08 | 31 | -0.0011 | 0.0010 | 0.2463 | 0.62  |
| TH | paracentral     | rs2820313  | A | G | A | G | -0.0060 | 0.0010 | 2.30E-09 | 35 | 0.0002  | 0.0010 | 0.8403 | 0.66  |
| TH | paracentral     | rs2863957  | C | A | C | A | 0.0102  | 0.0012 | 2.60E-18 | 77 | 0.0005  | 0.0012 | 0.6944 | 0.78  |
| TH | paracentral     | rs3776864  | A | C | A | C | 0.0057  | 0.0010 | 1.70E-08 | 32 | 0.0006  | 0.0011 | 0.5911 | 0.67  |
| TH | paracentral     | rs4585442  | A | G | A | G | -0.0063 | 0.0010 | 8.10E-10 | 38 | 0.0015  | 0.0011 | 0.1543 | 0.69  |
| TH | paracentral     | rs59779556 | T | G | T | G | 0.0055  | 0.0010 | 2.00E-08 | 32 | -0.0001 | 0.0010 | 0.9044 | 0.55  |
| TH | paracentral     | rs7524118  | T | C | T | C | -0.0058 | 0.0011 | 4.90E-08 | 30 | 0.0013  | 0.0011 | 0.2113 | 0.29  |
| TH | paracentral     | rs9321171  | C | T | C | T | 0.0054  | 0.0010 | 4.20E-08 | 31 | -0.0015 | 0.0010 | 0.1168 | 0.54  |
| TH | parahippocampal | rs11763750 | G | A | G | A | 0.0072  | 0.0012 | 5.10E-09 | 34 | -0.0021 | 0.0029 | 0.4736 | 34.18 |
| TH | parahippocampal | rs1229762  | C | T | C | T | -0.0072 | 0.0010 | 1.00E-12 | 51 | 0.0003  | 0.0025 | 0.9144 | 50.71 |
| TH | parahippocampal | rs12518468 | T | C | T | C | -0.0059 | 0.0010 | 8.50E-09 | 33 | -0.0002 | 0.0026 | 0.9362 | 33.22 |
| TH | parahippocampal | rs12567114 | G | A | G | A | 0.0063  | 0.0011 | 4.10E-09 | 34 | -0.0046 | 0.0027 | 0.0879 | 34.50 |
| TH | parahippocampal | rs12661667 | C | T | C | T | -0.0060 | 0.0011 | 2.80E-08 | 31 | 0.0014  | 0.0027 | 0.5878 | 30.68 |
| TH | parahippocampal | rs13107325 | C | T | C | T | -0.0133 | 0.0018 | 2.50E-13 | 53 | 0.0059  | 0.0049 | 0.2293 | 52.67 |
| TH | parahippocampal | rs1380703  | A | G | A | G | -0.0068 | 0.0010 | 1.60E-11 | 45 | 0.0013  | 0.0026 | 0.6218 | 45.34 |
| TH | parahippocampal | rs1607227  | G | T | G | T | 0.0064  | 0.0011 | 1.50E-09 | 36 | -0.0010 | 0.0027 | 0.7097 | 36.47 |
| TH | parahippocampal | rs17005118 | G | A | G | A | -0.0065 | 0.0011 | 2.50E-09 | 36 | 0.0021  | 0.0027 | 0.4422 | 35.56 |
| TH | parahippocampal | rs17388803 | A | C | A | C | -0.0098 | 0.0016 | 6.50E-10 | 38 | 0.0003  | 0.0038 | 0.9296 | 38.33 |
| TH | parahippocampal | rs2014830  | C | T | C | T | 0.0058  | 0.0011 | 2.70E-08 | 30 | -0.0020 | 0.0026 | 0.4339 | 30.35 |
| TH | parahippocampal | rs205024   | C | T | C | T | 0.0055  | 0.0010 | 2.70E-08 | 31 | -0.0003 | 0.0024 | 0.8924 | 31.23 |
| TH | parahippocampal | rs2820313  | A | G | A | G | -0.0060 | 0.0010 | 2.30E-09 | 35 | 0.0036  | 0.0025 | 0.1498 | 35.35 |
| TH | parahippocampal | rs2863957  | C | A | C | A | 0.0102  | 0.0012 | 2.60E-18 | 77 | -0.0009 | 0.0029 | 0.7477 | 77.04 |
| TH | parahippocampal | rs3776864  | A | C | A | C | 0.0057  | 0.0010 | 1.70E-08 | 32 | 0.0041  | 0.0026 | 0.1182 | 31.54 |

|    |                  |            |   |   |   |   |         |         |          |    |         |        |        |       |
|----|------------------|------------|---|---|---|---|---------|---------|----------|----|---------|--------|--------|-------|
| TH | parahippocampal  | rs4585442  | A | G | A | G | -0.0063 | 0.0010  | 8.10E-10 | 38 | -0.0001 | 0.0026 | 0.9594 | 37.51 |
| TH | parahippocampal  | rs5757675  | G | T | G | T | 0.0065  | 0.0011  | 2.70E-09 | 34 | -0.0065 | 0.0027 | 0.0150 | 34.50 |
| TH | parahippocampal  | rs59779556 | T | G | T | G | 0.0055  | 0.0010  | 2.00E-08 | 32 | -0.0015 | 0.0024 | 0.5272 | 32.32 |
| TH | parahippocampal  | rs7524118  | T | C | T | C | -0.0058 | 0.0011  | 4.90E-08 | 30 | 0.0020  | 0.0026 | 0.4335 | 29.90 |
| TH | parahippocampal  | rs9321171  | C | T | C | T | 0.0054  | 0.0010  | 4.20E-08 | 31 | -0.0040 | 0.0024 | 0.0985 | 30.72 |
| TH | superiortemporal | rs11763750 | G | A | G | A | 0.0072  | 0.0010  | 5.10E-09 | 34 | 0.0010  | 0.0012 | 0.3688 | 0.81  |
| TH | superiortemporal | rs1229762  | C | T | C | T | -0.0072 | -0.0012 | 1.00E-12 | 51 | -0.0012 | 0.0010 | 0.2168 | 0.34  |
| TH | superiortemporal | rs12518468 | T | C | T | C | -0.0059 | 0.0017  | 8.50E-09 | 33 | 0.0017  | 0.0010 | 0.0974 | 0.67  |
| TH | superiortemporal | rs12567114 | G | A | G | A | 0.0063  | -0.0009 | 4.10E-09 | 34 | -0.0009 | 0.0011 | 0.4238 | 0.72  |
| TH | superiortemporal | rs12661667 | C | T | C | T | -0.0060 | -0.0014 | 2.80E-08 | 31 | -0.0014 | 0.0011 | 0.1889 | 0.74  |
| TH | superiortemporal | rs13107325 | C | T | C | T | -0.0133 | -0.0040 | 2.50E-13 | 53 | -0.0040 | 0.0018 | 0.0410 | 0.93  |
| TH | superiortemporal | rs1380703  | A | G | A | G | -0.0068 | -0.0012 | 1.60E-11 | 45 | -0.0012 | 0.0010 | 0.2396 | 0.62  |
| TH | superiortemporal | rs1607227  | G | T | G | T | 0.0064  | 0.0019  | 1.50E-09 | 36 | 0.0019  | 0.0011 | 0.0699 | 0.70  |
| TH | superiortemporal | rs17005118 | G | A | G | A | -0.0065 | 0.0001  | 2.50E-09 | 36 | 0.0001  | 0.0011 | 0.9355 | 0.74  |
| TH | superiortemporal | rs17388803 | A | C | A | C | -0.0098 | -0.0021 | 6.50E-10 | 38 | -0.0021 | 0.0016 | 0.1553 | 0.89  |
| TH | superiortemporal | rs2014830  | C | T | C | T | 0.0058  | 0.0010  | 2.70E-08 | 30 | 0.0010  | 0.0011 | 0.3468 | 0.70  |
| TH | superiortemporal | rs205024   | C | T | C | T | 0.0055  | -0.0010 | 2.70E-08 | 31 | -0.0010 | 0.0010 | 0.2744 | 0.62  |
| TH | superiortemporal | rs2820313  | A | G | A | G | -0.0060 | -0.0009 | 2.30E-09 | 35 | -0.0009 | 0.0010 | 0.3399 | 0.66  |
| TH | superiortemporal | rs2863957  | C | A | C | A | 0.0102  | -0.0005 | 2.60E-18 | 77 | -0.0005 | 0.0012 | 0.6417 | 0.78  |
| TH | superiortemporal | rs3776864  | A | C | A | C | 0.0057  | 0.0011  | 1.70E-08 | 32 | 0.0011  | 0.0010 | 0.3053 | 0.67  |
| TH | superiortemporal | rs4585442  | A | G | A | G | -0.0063 | -0.0010 | 8.10E-10 | 38 | -0.0010 | 0.0010 | 0.3214 | 0.69  |
| TH | superiortemporal | rs5757675  | G | T | G | T | 0.0065  | 0.0006  | 2.70E-09 | 34 | 0.0006  | 0.0011 | 0.6007 | 0.26  |
| TH | superiortemporal | rs59779556 | T | G | T | G | 0.0055  | 0.0007  | 2.00E-08 | 32 | 0.0007  | 0.0010 | 0.4321 | 0.55  |
| TH | superiortemporal | rs7524118  | T | C | T | C | -0.0058 | 0.0005  | 4.90E-08 | 30 | 0.0005  | 0.0011 | 0.6406 | 0.29  |
| TH | superiortemporal | rs9321171  | C | T | C | T | 0.0054  | 0.0013  | 4.20E-08 | 31 | 0.0013  | 0.0010 | 0.1751 | 0.54  |

**Table S1. The details of genetic instruments predicting short sleep and cortical SA/TH**

| The details of genetic instruments predicting morningness and cortical SA/TH |          |             |                 |                 |                |            |                   |                 |                  |    |              |            |             |         |
|------------------------------------------------------------------------------|----------|-------------|-----------------|-----------------|----------------|------------|-------------------|-----------------|------------------|----|--------------|------------|-------------|---------|
| cortical<br>SA/TH                                                            | Exposure | SNP         | EA.exposur<br>e | OA.exposur<br>e | EA.outcom<br>e | OA.outcome | beta.exposur<br>e | se.exposur<br>e | pvaLexposur<br>e | F  | beta.outcome | se.outcome | pvaLoutcome | MA<br>F |
| SA                                                                           | cuneus   | rs10518440  | G               | A               | G              | A          | 0.0310            | 0.0030          | 2.07E-24         | 28 | -0.8586      | 1.7885     | 0.6312      | 0.16    |
| SA                                                                           | cuneus   | rs10737452  | C               | T               | C              | T          | 0.0159            | 0.0023          | 6.30E-12         | 22 | 1.0576       | 1.3646     | 0.4383      | 0.38    |
| SA                                                                           | cuneus   | rs1109088   | G               | A               | G              | A          | -0.0129           | 0.0023          | 2.09E-08         | 15 | 0.1738       | 1.3766     | 0.8995      | 0.43    |
| SA                                                                           | cuneus   | rs112439757 | T               | C               | T              | C          | -0.0219           | 0.0029          | 6.57E-14         | 17 | -2.1498      | 1.7215     | 0.2117      | 0.18    |
| SA                                                                           | cuneus   | rs12054920  | T               | C               | T              | C          | -0.0156           | 0.0022          | 3.95E-12         | 24 | 0.0857       | 1.3355     | 0.9488      | 0.48    |
| SA                                                                           | cuneus   | rs12206116  | A               | G               | A              | G          | 0.0126            | 0.0023          | 4.40E-08         | 14 | 3.0260       | 1.3496     | 0.0250      | 0.40    |
| SA                                                                           | cuneus   | rs12431576  | C               | T               | C              | T          | -0.0148           | 0.0024          | 7.63E-10         | 17 | -2.1763      | 1.4281     | 0.1275      | 0.33    |
| SA                                                                           | cuneus   | rs12927162  | G               | A               | G              | A          | -0.0234           | 0.0025          | 9.89E-21         | 35 | 0.5742       | 1.6515     | 0.7281      | 0.28    |
| SA                                                                           | cuneus   | rs12956276  | A               | G               | A              | G          | 0.0132            | 0.0023          | 1.45E-08         | 15 | 1.4471       | 1.4123     | 0.3055      | 0.35    |

|    |        |            |   |   |   |   |         |        |          |    |         |        |        |      |
|----|--------|------------|---|---|---|---|---------|--------|----------|----|---------|--------|--------|------|
| SA | cuneus | rs13167796 | A | G | A | G | -0.0147 | 0.0026 | 1.67E-08 | 12 | -2.1946 | 1.5465 | 0.1559 | 0.25 |
| SA | cuneus | rs1323591  | T | C | T | C | -0.0143 | 0.0024 | 1.64E-09 | 16 | -1.5007 | 1.4470 | 0.2997 | 0.32 |
| SA | cuneus | rs139911   | C | T | C | T | 0.0183  | 0.0023 | 9.94E-16 | 31 | 0.1495  | 1.3512 | 0.9119 | 0.42 |
| SA | cuneus | rs1421085  | C | T | C | T | 0.0215  | 0.0023 | 4.08E-21 | 43 | 0.7427  | 1.3397 | 0.5793 | 0.40 |
| SA | cuneus | rs17448682 | T | C | T | C | 0.0160  | 0.0027 | 1.75E-09 | 13 | 0.7654  | 1.5751 | 0.6270 | 0.23 |
| SA | cuneus | rs17697212 | C | T | C | T | -0.0162 | 0.0028 | 1.02E-08 | 10 | -0.7975 | 1.6610 | 0.6311 | 0.20 |
| SA | cuneus | rs202157   | C | T | C | T | 0.0193  | 0.0025 | 4.42E-15 | 26 | 1.0153  | 1.4384 | 0.4803 | 0.30 |
| SA | cuneus | rs2232839  | T | C | T | C | -0.0211 | 0.0028 | 4.81E-14 | 19 | 0.5419  | 1.8221 | 0.7662 | 0.21 |
| SA | cuneus | rs2291589  | G | T | G | T | -0.0165 | 0.0023 | 8.13E-13 | 24 | -2.3538 | 1.3816 | 0.0884 | 0.38 |
| SA | cuneus | rs2653349  | A | G | A | G | 0.0295  | 0.0027 | 4.50E-27 | 39 | 0.3027  | 1.6395 | 0.8535 | 0.21 |
| SA | cuneus | rs2701524  | C | T | C | T | -0.0126 | 0.0023 | 4.36E-08 | 15 | 0.6953  | 1.4043 | 0.6205 | 0.41 |
| SA | cuneus | rs2794682  | T | C | T | C | 0.0170  | 0.0023 | 9.34E-14 | 27 | 2.4473  | 1.3658 | 0.0732 | 0.40 |
| SA | cuneus | rs28634184 | T | C | T | C | -0.0142 | 0.0026 | 3.97E-08 | 11 | -0.1421 | 1.5422 | 0.9266 | 0.25 |
| SA | cuneus | rs2881955  | T | C | T | C | 0.0144  | 0.0025 | 8.59E-09 | 13 | 2.1968  | 1.4724 | 0.1357 | 0.28 |
| SA | cuneus | rs2916142  | T | C | T | C | 0.0135  | 0.0023 | 4.41E-09 | 17 | 2.8526  | 1.3349 | 0.0326 | 0.46 |
| SA | cuneus | rs2971970  | T | G | T | G | 0.0168  | 0.0027 | 6.19E-10 | 13 | -0.4235 | 1.6250 | 0.7944 | 0.22 |
| SA | cuneus | rs3100052  | A | G | A | G | 0.0126  | 0.0023 | 4.35E-08 | 14 | -0.2379 | 1.3740 | 0.8625 | 0.39 |
| SA | cuneus | rs34571177 | G | T | G | T | -0.0174 | 0.0029 | 2.68E-09 | 10 | -0.6449 | 1.7256 | 0.7086 | 0.18 |
| SA | cuneus | rs35376824 | G | A | G | A | -0.0161 | 0.0026 | 1.12E-09 | 13 | -1.0022 | 1.5760 | 0.5249 | 0.23 |
| SA | cuneus | rs35935113 | C | T | C | T | -0.0124 | 0.0023 | 3.59E-08 | 15 | 0.6408  | 1.3216 | 0.6278 | 0.45 |
| SA | cuneus | rs36117029 | G | A | G | A | 0.0129  | 0.0024 | 3.76E-08 | 14 | 0.4389  | 1.3871 | 0.7517 | 0.36 |
| SA | cuneus | rs3808477  | T | C | T | C | 0.0174  | 0.0025 | 3.30E-12 | 20 | -0.8420 | 1.4576 | 0.5635 | 0.28 |
| SA | cuneus | rs4241964  | G | T | G | T | 0.0160  | 0.0023 | 1.41E-12 | 25 | 0.2869  | 1.3648 | 0.8335 | 0.48 |
| SA | cuneus | rs4245555  | C | T | C | T | 0.0173  | 0.0023 | 6.13E-14 | 27 | 2.9802  | 1.3438 | 0.0266 | 0.41 |
| SA | cuneus | rs4549082  | C | T | C | T | 0.0170  | 0.0022 | 3.61E-14 | 29 | 0.7706  | 1.4341 | 0.5911 | 0.48 |



|    |        |            |   |   |   |   |         |        |          |    |         |        |        |      |
|----|--------|------------|---|---|---|---|---------|--------|----------|----|---------|--------|--------|------|
| SA | cuneus | rs4550384  | G | T | G | T | -0.0146 | 0.0026 | 2.49E-08 | 11 | 1.8023  | 1.5495 | 0.2448 | 0.24 |
| SA | cuneus | rs4588790  | T | C | T | C | -0.0130 | 0.0023 | 1.84E-08 | 15 | -0.3081 | 1.3435 | 0.8186 | 0.38 |
| SA | cuneus | rs4622900  | C | T | C | T | -0.0125 | 0.0023 | 2.99E-08 | 15 | -0.9805 | 1.3319 | 0.4616 | 0.44 |
| SA | cuneus | rs4899502  | G | A | G | A | 0.0136  | 0.0024 | 1.83E-08 | 14 | -0.5164 | 1.4208 | 0.7162 | 0.31 |
| SA | cuneus | rs4936289  | G | A | G | A | 0.0131  | 0.0023 | 1.33E-08 | 15 | 2.2864  | 1.3967 | 0.1016 | 0.38 |
| SA | cuneus | rs55910701 | T | C | T | C | -0.0179 | 0.0026 | 1.05E-11 | 17 | 1.6736  | 1.5594 | 0.2832 | 0.24 |
| SA | cuneus | rs56049037 | A | G | A | G | -0.0159 | 0.0025 | 1.64E-10 | 17 | 1.0664  | 1.5813 | 0.5001 | 0.29 |
| SA | cuneus | rs56076457 | C | T | C | T | -0.0127 | 0.0022 | 1.58E-08 | 16 | -0.0858 | 1.3202 | 0.9482 | 0.47 |
| SA | cuneus | rs6131942  | A | G | A | G | -0.0136 | 0.0023 | 2.31E-09 | 17 | -0.7285 | 1.3397 | 0.5866 | 0.42 |
| SA | cuneus | rs61773390 | T | G | T | G | 0.0258  | 0.0028 | 5.34E-20 | 26 | 3.3037  | 1.6767 | 0.0488 | 0.20 |
| SA | cuneus | rs62172117 | A | G | A | G | -0.0159 | 0.0023 | 1.08E-11 | 21 | 0.9887  | 1.3801 | 0.4737 | 0.36 |
| SA | cuneus | rs62182115 | T | C | T | C | -0.0135 | 0.0024 | 1.04E-08 | 15 | 1.0768  | 1.4437 | 0.4558 | 0.34 |
| SA | cuneus | rs6441371  | A | C | A | C | 0.0140  | 0.0023 | 5.54E-10 | 19 | 0.6157  | 1.3071 | 0.6376 | 0.48 |
| SA | cuneus | rs6778003  | T | G | T | G | 0.0152  | 0.0025 | 6.05E-10 | 16 | -0.0115 | 1.5648 | 0.9941 | 0.29 |
| SA | cuneus | rs6990077  | T | C | T | C | -0.0185 | 0.0027 | 7.90E-12 | 16 | -1.0922 | 1.6128 | 0.4983 | 0.22 |
| SA | cuneus | rs7196720  | T | C | T | C | 0.0125  | 0.0022 | 2.23E-08 | 16 | 2.9308  | 1.3428 | 0.0291 | 0.49 |
| SA | cuneus | rs72720396 | G | A | G | A | 0.0223  | 0.0027 | 4.36E-17 | 25 | 2.0885  | 1.6312 | 0.2004 | 0.23 |
| SA | cuneus | rs7304278  | A | G | A | G | -0.0149 | 0.0025 | 3.59E-09 | 14 | 2.1070  | 1.4593 | 0.1488 | 0.28 |
| SA | cuneus | rs73095857 | T | G | T | G | 0.0134  | 0.0023 | 3.52E-09 | 17 | -1.7824 | 1.3928 | 0.2006 | 0.42 |
| SA | cuneus | rs7313852  | A | G | A | G | -0.0226 | 0.0023 | 2.52E-23 | 49 | -1.2072 | 1.3777 | 0.3809 | 0.44 |
| SA | cuneus | rs735459   | C | T | C | T | 0.0155  | 0.0024 | 5.25E-11 | 20 | -0.1166 | 1.4021 | 0.9337 | 0.36 |
| SA | cuneus | rs7598252  | G | A | G | A | -0.0128 | 0.0023 | 2.00E-08 | 16 | 0.1099  | 1.3243 | 0.9339 | 0.47 |
| SA | cuneus | rs7783012  | G | A | G | A | -0.0140 | 0.0023 | 1.09E-09 | 18 | -3.5002 | 1.3418 | 0.0091 | 0.41 |
| SA | cuneus | rs77960    | A | G | A | G | 0.0136  | 0.0024 | 1.22E-08 | 14 | -1.3926 | 1.4236 | 0.3279 | 0.33 |
| SA | cuneus | rs7925560  | A | G | A | G | -0.0173 | 0.0027 | 6.54E-11 | 15 | -0.7785 | 1.5421 | 0.6137 | 0.23 |

|    |                  |             |   |   |   |   |         |        |          |    |         |        |        |      |
|----|------------------|-------------|---|---|---|---|---------|--------|----------|----|---------|--------|--------|------|
| SA | cuneus           | rs7959983   | C | T | C | T | 0.0151  | 0.0023 | 3.17E-11 | 21 | -0.3672 | 1.3461 | 0.7850 | 0.40 |
| SA | cuneus           | rs8072507   | C | T | C | T | 0.0150  | 0.0025 | 1.37E-09 | 15 | -3.2320 | 1.4316 | 0.0240 | 0.29 |
| SA | cuneus           | rs9348050   | T | C | T | C | 0.0133  | 0.0022 | 3.44E-09 | 17 | -0.2167 | 1.3376 | 0.8713 | 0.49 |
| SA | cuneus           | rs9395520   | T | C | T | C | 0.0180  | 0.0024 | 1.59E-13 | 23 | 0.5959  | 1.4215 | 0.6751 | 0.30 |
| SA | cuneus           | rs9597250   | A | C | A | C | -0.0178 | 0.0029 | 6.12E-10 | 12 | 2.2227  | 1.6590 | 0.1803 | 0.19 |
| SA | cuneus           | rs974552    | G | A | G | A | 0.0192  | 0.0028 | 1.48E-11 | 14 | 4.8243  | 1.7686 | 0.0064 | 0.19 |
| SA | cuneus           | rs9795439   | A | G | A | G | 0.0163  | 0.0028 | 6.68E-09 | 11 | 1.0536  | 1.9343 | 0.5859 | 0.20 |
| SA | cuneus           | rs9964420   | A | C | A | C | -0.0202 | 0.0025 | 2.46E-16 | 28 | 1.0271  | 1.4635 | 0.4828 | 0.30 |
| SA | inferiorparietal | rs10518440  | G | A | G | A | 0.0310  | 0.0030 | 2.07E-24 | 28 | -2.6100 | 5.1952 | 0.6154 | 0.16 |
| SA | inferiorparietal | rs10737452  | C | T | C | T | 0.0159  | 0.0023 | 6.30E-12 | 22 | -4.4198 | 3.9687 | 0.2654 | 0.38 |
| SA | inferiorparietal | rs112439757 | T | C | T | C | -0.0219 | 0.0029 | 6.57E-14 | 17 | -7.4379 | 5.0071 | 0.1374 | 0.18 |
| SA | inferiorparietal | rs12206116  | A | G | A | G | 0.0126  | 0.0023 | 4.40E-08 | 14 | -6.4759 | 3.9348 | 0.0998 | 0.40 |
| SA | inferiorparietal | rs12431576  | C | T | C | T | -0.0148 | 0.0024 | 7.63E-10 | 17 | 6.1051  | 4.1540 | 0.1416 | 0.33 |
| SA | inferiorparietal | rs12927162  | G | A | G | A | -0.0234 | 0.0025 | 9.89E-21 | 35 | 0.5880  | 4.8092 | 0.9027 | 0.28 |
| SA | inferiorparietal | rs12956276  | A | G | A | G | 0.0132  | 0.0023 | 1.45E-08 | 15 | 2.8852  | 4.1130 | 0.4830 | 0.35 |
| SA | inferiorparietal | rs1323591   | T | C | T | C | -0.0143 | 0.0024 | 1.64E-09 | 16 | 3.4054  | 4.2180 | 0.4195 | 0.32 |
| SA | inferiorparietal | rs139911    | C | T | C | T | 0.0183  | 0.0023 | 9.94E-16 | 31 | -7.1841 | 3.9276 | 0.0674 | 0.42 |

|    |                      |            |   |   |   |   |         |        |          |    |         |        |        |      |
|----|----------------------|------------|---|---|---|---|---------|--------|----------|----|---------|--------|--------|------|
| SA | inferiorparieta<br>l | rs1421085  | C | T | C | T | 0.0215  | 0.0023 | 4.08E-21 | 43 | -3.3393 | 3.8935 | 0.3911 | 0.40 |
| SA | inferiorparieta<br>l | rs17448682 | T | C | T | C | 0.0160  | 0.0027 | 1.75E-09 | 13 | -6.3976 | 4.5929 | 0.1636 | 0.23 |
| SA | inferiorparieta<br>l | rs17697212 | C | T | C | T | -0.0162 | 0.0028 | 1.02E-08 | 10 | 7.7073  | 4.8279 | 0.1104 | 0.20 |
| SA | inferiorparieta<br>l | rs202157   | C | T | C | T | 0.0193  | 0.0025 | 4.42E-15 | 26 | -3.3108 | 4.1861 | 0.4290 | 0.30 |
| SA | inferiorparieta<br>l | rs2232839  | T | C | T | C | -0.0211 | 0.0028 | 4.81E-14 | 19 | 1.0715  | 5.3348 | 0.8408 | 0.21 |
| SA | inferiorparieta<br>l | rs2291589  | G | T | G | T | -0.0165 | 0.0023 | 8.13E-13 | 24 | 2.6289  | 4.0260 | 0.5138 | 0.38 |
| SA | inferiorparieta<br>l | rs2653349  | A | G | A | G | 0.0295  | 0.0027 | 4.50E-27 | 39 | 5.8314  | 4.7748 | 0.2220 | 0.21 |
| SA | inferiorparieta<br>l | rs2701524  | C | T | C | T | -0.0126 | 0.0023 | 4.36E-08 | 15 | 6.1712  | 4.0960 | 0.1319 | 0.41 |
| SA | inferiorparieta<br>l | rs2794682  | T | C | T | C | 0.0170  | 0.0023 | 9.34E-14 | 27 | 0.1355  | 3.9653 | 0.9727 | 0.40 |
| SA | inferiorparieta<br>l | rs2881955  | T | C | T | C | 0.0144  | 0.0025 | 8.59E-09 | 13 | 0.3045  | 4.2728 | 0.9432 | 0.28 |
| SA | inferiorparieta<br>l | rs2916142  | T | C | T | C | 0.0135  | 0.0023 | 4.41E-09 | 17 | 0.2249  | 3.8771 | 0.9537 | 0.46 |
| SA | inferiorparieta<br>l | rs3100052  | A | G | A | G | 0.0126  | 0.0023 | 4.35E-08 | 14 | -1.6799 | 4.0024 | 0.6747 | 0.39 |
| SA | inferiorparieta<br>l | rs34571177 | G | T | G | T | -0.0174 | 0.0029 | 2.68E-09 | 10 | 2.3556  | 5.0307 | 0.6396 | 0.18 |

|    |                      |            |   |   |   |   |         |        |          |    |          |        |        |      |
|----|----------------------|------------|---|---|---|---|---------|--------|----------|----|----------|--------|--------|------|
| SA | inferiorparieta<br>l | rs35376824 | G | A | G | A | -0.0161 | 0.0026 | 1.12E-09 | 13 | 4.5813   | 4.5959 | 0.3188 | 0.23 |
| SA | inferiorparieta<br>l | rs35935113 | C | T | C | T | -0.0124 | 0.0023 | 3.59E-08 | 15 | 2.7217   | 3.8466 | 0.4792 | 0.45 |
| SA | inferiorparieta<br>l | rs36117029 | G | A | G | A | 0.0129  | 0.0024 | 3.76E-08 | 14 | -0.8722  | 4.0352 | 0.8289 | 0.36 |
| SA | inferiorparieta<br>l | rs3808477  | T | C | T | C | 0.0174  | 0.0025 | 3.30E-12 | 20 | -1.7137  | 4.2453 | 0.6865 | 0.28 |
| SA | inferiorparieta<br>l | rs4241964  | G | T | G | T | 0.0160  | 0.0023 | 1.41E-12 | 25 | 3.4298   | 3.9686 | 0.3875 | 0.48 |
| SA | inferiorparieta<br>l | rs4245555  | C | T | C | T | 0.0173  | 0.0023 | 6.13E-14 | 27 | -5.0701  | 3.9029 | 0.1939 | 0.41 |
| SA | inferiorparieta<br>l | rs4549082  | C | T | C | T | 0.0170  | 0.0022 | 3.61E-14 | 29 | 0.0768   | 4.1564 | 0.9853 | 0.48 |
| SA | inferiorparieta<br>l | rs4550384  | G | T | G | T | -0.0146 | 0.0026 | 2.49E-08 | 11 | 4.1377   | 4.5226 | 0.3603 | 0.24 |
| SA | inferiorparieta<br>l | rs4588790  | T | C | T | C | -0.0130 | 0.0023 | 1.84E-08 | 15 | 3.7418   | 3.9159 | 0.3393 | 0.38 |
| SA | inferiorparieta<br>l | rs4622900  | C | T | C | T | -0.0125 | 0.0023 | 2.99E-08 | 15 | -2.6864  | 3.8717 | 0.4878 | 0.44 |
| SA | inferiorparieta<br>l | rs4899502  | G | A | G | A | 0.0136  | 0.0024 | 1.83E-08 | 14 | -1.3011  | 4.1336 | 0.7529 | 0.31 |
| SA | inferiorparieta<br>l | rs4936289  | G | A | G | A | 0.0131  | 0.0023 | 1.33E-08 | 15 | -2.6383  | 4.0544 | 0.5152 | 0.38 |
| SA | inferiorparieta<br>l | rs55910701 | T | C | T | C | -0.0179 | 0.0026 | 1.05E-11 | 17 | -10.7108 | 4.5407 | 0.0183 | 0.24 |

|    |                      |            |   |   |   |   |         |        |          |    |          |        |        |      |
|----|----------------------|------------|---|---|---|---|---------|--------|----------|----|----------|--------|--------|------|
| SA | inferiorparieta<br>l | rs56049037 | A | G | A | G | -0.0159 | 0.0025 | 1.64E-10 | 17 | -3.3921  | 4.6175 | 0.4626 | 0.29 |
| SA | inferiorparieta<br>l | rs56076457 | C | T | C | T | -0.0127 | 0.0022 | 1.58E-08 | 16 | 2.7936   | 3.8447 | 0.4675 | 0.47 |
| SA | inferiorparieta<br>l | rs6131942  | A | G | A | G | -0.0136 | 0.0023 | 2.31E-09 | 17 | -0.6404  | 3.9023 | 0.8696 | 0.42 |
| SA | inferiorparieta<br>l | rs61773390 | T | G | T | G | 0.0258  | 0.0028 | 5.34E-20 | 26 | -14.6269 | 4.8818 | 0.0027 | 0.20 |
| SA | inferiorparieta<br>l | rs62172117 | A | G | A | G | -0.0159 | 0.0023 | 1.08E-11 | 21 | -4.9141  | 4.0202 | 0.2216 | 0.36 |
| SA | inferiorparieta<br>l | rs62182115 | T | C | T | C | -0.0135 | 0.0024 | 1.04E-08 | 15 | -4.2537  | 4.1885 | 0.3098 | 0.34 |
| SA | inferiorparieta<br>l | rs6441371  | A | C | A | C | 0.0140  | 0.0023 | 5.54E-10 | 19 | 0.2032   | 3.8019 | 0.9574 | 0.48 |
| SA | inferiorparieta<br>l | rs6778003  | T | G | T | G | 0.0152  | 0.0025 | 6.05E-10 | 16 | 0.4123   | 4.5568 | 0.9279 | 0.29 |
| SA | inferiorparieta<br>l | rs6990077  | T | C | T | C | -0.0185 | 0.0027 | 7.90E-12 | 16 | 1.0198   | 4.6822 | 0.8276 | 0.22 |
| SA | inferiorparieta<br>l | rs7196720  | T | C | T | C | 0.0125  | 0.0022 | 2.23E-08 | 16 | -4.3956  | 3.9029 | 0.2601 | 0.49 |
| SA | inferiorparieta<br>l | rs7304278  | A | G | A | G | -0.0149 | 0.0025 | 3.59E-09 | 14 | 0.8339   | 4.2461 | 0.8443 | 0.28 |
| SA | inferiorparieta<br>l | rs73095857 | T | G | T | G | 0.0134  | 0.0023 | 3.52E-09 | 17 | -2.7951  | 4.0396 | 0.4890 | 0.42 |
| SA | inferiorparieta<br>l | rs7313852  | A | G | A | G | -0.0226 | 0.0023 | 2.52E-23 | 49 | -1.3740  | 4.0117 | 0.7320 | 0.44 |

|    |                      |             |   |   |   |   |         |        |          |    |          |        |        |      |
|----|----------------------|-------------|---|---|---|---|---------|--------|----------|----|----------|--------|--------|------|
| SA | inferiorparieta<br>l | rs735459    | C | T | C | T | 0.0155  | 0.0024 | 5.25E-11 | 20 | -1.9068  | 4.0838 | 0.6406 | 0.36 |
| SA | inferiorparieta<br>l | rs7598252   | G | A | G | A | -0.0128 | 0.0023 | 2.00E-08 | 16 | -11.3370 | 3.8526 | 0.0033 | 0.47 |
| SA | inferiorparieta<br>l | rs7783012   | G | A | G | A | -0.0140 | 0.0023 | 1.09E-09 | 18 | 8.6010   | 3.9109 | 0.0279 | 0.41 |
| SA | inferiorparieta<br>l | rs77960     | A | G | A | G | 0.0136  | 0.0024 | 1.22E-08 | 14 | 0.9080   | 4.1427 | 0.8265 | 0.33 |
| SA | inferiorparieta<br>l | rs8072507   | C | T | C | T | 0.0150  | 0.0025 | 1.37E-09 | 15 | 9.0804   | 4.1673 | 0.0293 | 0.29 |
| SA | inferiorparieta<br>l | rs9348050   | T | C | T | C | 0.0133  | 0.0022 | 3.44E-09 | 17 | -1.2120  | 3.9026 | 0.7561 | 0.49 |
| SA | inferiorparieta<br>l | rs9395520   | T | C | T | C | 0.0180  | 0.0024 | 1.59E-13 | 23 | 1.8859   | 4.1376 | 0.6485 | 0.30 |
| SA | inferiorparieta<br>l | rs9597250   | A | C | A | C | -0.0178 | 0.0029 | 6.12E-10 | 12 | 3.1225   | 4.8325 | 0.5182 | 0.19 |
| SA | inferiorparieta<br>l | rs974552    | G | A | G | A | 0.0192  | 0.0028 | 1.48E-11 | 14 | 0.9950   | 5.1566 | 0.8470 | 0.19 |
| SA | inferiorparieta<br>l | rs9795439   | A | G | A | G | 0.0163  | 0.0028 | 6.68E-09 | 11 | -7.7084  | 5.6273 | 0.1707 | 0.20 |
| SA | inferiorparieta<br>l | rs9964420   | A | C | A | C | -0.0202 | 0.0025 | 2.46E-16 | 28 | 9.8477   | 4.2614 | 0.0208 | 0.30 |
| SA | lateraloccipital     | rs10518440  | G | A | G | A | 0.0310  | 0.0030 | 2.07E-24 | 28 | 5.5752   | 4.5963 | 0.2251 | 0.16 |
| SA | lateraloccipital     | rs10737452  | C | T | C | T | 0.0159  | 0.0023 | 6.30E-12 | 22 | -0.4574  | 3.5086 | 0.8963 | 0.38 |
| SA | lateraloccipital     | rs1109088   | G | A | G | A | -0.0129 | 0.0023 | 2.09E-08 | 15 | 4.9317   | 3.5478 | 0.1645 | 0.43 |
| SA | lateraloccipital     | rs112439757 | T | C | T | C | -0.0219 | 0.0029 | 6.57E-14 | 17 | -2.5956  | 4.4303 | 0.5580 | 0.18 |

|    |                  |            |   |   |   |   |         |        |          |    |          |        |        |      |
|----|------------------|------------|---|---|---|---|---------|--------|----------|----|----------|--------|--------|------|
| SA | lateraloccipital | rs12054920 | T | C | T | C | -0.0156 | 0.0022 | 3.95E-12 | 24 | -3.5377  | 3.4348 | 0.3030 | 0.48 |
| SA | lateraloccipital | rs12206116 | A | G | A | G | 0.0126  | 0.0023 | 4.40E-08 | 14 | 3.6678   | 3.4764 | 0.2914 | 0.40 |
| SA | lateraloccipital | rs12431576 | C | T | C | T | -0.0148 | 0.0024 | 7.63E-10 | 17 | -14.1514 | 3.6693 | 0.0001 | 0.33 |
| SA | lateraloccipital | rs12927162 | G | A | G | A | -0.0234 | 0.0025 | 9.89E-21 | 35 | 2.2252   | 4.2500 | 0.6006 | 0.28 |
| SA | lateraloccipital | rs12956276 | A | G | A | G | 0.0132  | 0.0023 | 1.45E-08 | 15 | 6.7041   | 3.6363 | 0.0652 | 0.35 |
| SA | lateraloccipital | rs13167796 | A | G | A | G | -0.0147 | 0.0026 | 1.67E-08 | 12 | 4.5336   | 3.9756 | 0.2541 | 0.25 |
| SA | lateraloccipital | rs1323591  | T | C | T | C | -0.0143 | 0.0024 | 1.64E-09 | 16 | -0.2289  | 3.7212 | 0.9510 | 0.32 |
| SA | lateraloccipital | rs139911   | C | T | C | T | 0.0183  | 0.0023 | 9.94E-16 | 31 | -5.0542  | 3.4755 | 0.1459 | 0.42 |
| SA | lateraloccipital | rs1421085  | C | T | C | T | 0.0215  | 0.0023 | 4.08E-21 | 43 | -2.6429  | 3.4443 | 0.4429 | 0.40 |
| SA | lateraloccipital | rs17448682 | T | C | T | C | 0.0160  | 0.0027 | 1.75E-09 | 13 | 5.6607   | 4.0659 | 0.1638 | 0.23 |
| SA | lateraloccipital | rs17697212 | C | T | C | T | -0.0162 | 0.0028 | 1.02E-08 | 10 | 0.8698   | 4.2762 | 0.8388 | 0.20 |
| SA | lateraloccipital | rs202157   | C | T | C | T | 0.0193  | 0.0025 | 4.42E-15 | 26 | 4.7258   | 3.7035 | 0.2019 | 0.30 |
| SA | lateraloccipital | rs2232839  | T | C | T | C | -0.0211 | 0.0028 | 4.81E-14 | 19 | -1.9512  | 4.6985 | 0.6779 | 0.21 |
| SA | lateraloccipital | rs2291589  | G | T | G | T | -0.0165 | 0.0023 | 8.13E-13 | 24 | -2.7887  | 3.5577 | 0.4331 | 0.38 |
| SA | lateraloccipital | rs2653349  | A | G | A | G | 0.0295  | 0.0027 | 4.50E-27 | 39 | 3.6333   | 4.2180 | 0.3890 | 0.21 |
| SA | lateraloccipital | rs2701524  | C | T | C | T | -0.0126 | 0.0023 | 4.36E-08 | 15 | 0.2263   | 3.6148 | 0.9501 | 0.41 |
| SA | lateraloccipital | rs2794682  | T | C | T | C | 0.0170  | 0.0023 | 9.34E-14 | 27 | 7.7863   | 3.5120 | 0.0266 | 0.40 |
| SA | lateraloccipital | rs28634184 | T | C | T | C | -0.0142 | 0.0026 | 3.97E-08 | 11 | 3.4668   | 3.9645 | 0.3819 | 0.25 |
| SA | lateraloccipital | rs2881955  | T | C | T | C | 0.0144  | 0.0025 | 8.59E-09 | 13 | 5.0350   | 3.7825 | 0.1831 | 0.28 |
| SA | lateraloccipital | rs2916142  | T | C | T | C | 0.0135  | 0.0023 | 4.41E-09 | 17 | 3.9276   | 3.4280 | 0.2519 | 0.46 |
| SA | lateraloccipital | rs2971970  | T | G | T | G | 0.0168  | 0.0027 | 6.19E-10 | 13 | 0.7022   | 4.1813 | 0.8666 | 0.22 |
| SA | lateraloccipital | rs3100052  | A | G | A | G | 0.0126  | 0.0023 | 4.35E-08 | 14 | 3.1722   | 3.5360 | 0.3696 | 0.39 |
| SA | lateraloccipital | rs34571177 | G | T | G | T | -0.0174 | 0.0029 | 2.68E-09 | 10 | -6.2207  | 4.4410 | 0.1613 | 0.18 |
| SA | lateraloccipital | rs35376824 | G | A | G | A | -0.0161 | 0.0026 | 1.12E-09 | 13 | -1.5265  | 4.0595 | 0.7069 | 0.23 |
| SA | lateraloccipital | rs35935113 | C | T | C | T | -0.0124 | 0.0023 | 3.59E-08 | 15 | -4.0243  | 3.4000 | 0.2366 | 0.45 |

|    |                  |            |   |   |   |   |         |        |          |    |         |        |        |      |
|----|------------------|------------|---|---|---|---|---------|--------|----------|----|---------|--------|--------|------|
| SA | lateraloccipital | rs36117029 | G | A | G | A | 0.0129  | 0.0024 | 3.76E-08 | 14 | 2.4099  | 3.5710 | 0.4998 | 0.36 |
| SA | lateraloccipital | rs3808477  | T | C | T | C | 0.0174  | 0.0025 | 3.30E-12 | 20 | -4.7581 | 3.7521 | 0.2048 | 0.28 |
| SA | lateraloccipital | rs4241964  | G | T | G | T | 0.0160  | 0.0023 | 1.41E-12 | 25 | 4.2403  | 3.5084 | 0.2268 | 0.48 |
| SA | lateraloccipital | rs4245555  | C | T | C | T | 0.0173  | 0.0023 | 6.13E-14 | 27 | 1.9631  | 3.4537 | 0.5698 | 0.41 |
| SA | lateraloccipital | rs4549082  | C | T | C | T | 0.0170  | 0.0022 | 3.61E-14 | 29 | 9.3585  | 3.6853 | 0.0111 | 0.48 |
| SA | lateraloccipital | rs4550384  | G | T | G | T | -0.0146 | 0.0026 | 2.49E-08 | 11 | -9.2436 | 3.9886 | 0.0205 | 0.24 |
| SA | lateraloccipital | rs4588790  | T | C | T | C | -0.0130 | 0.0023 | 1.84E-08 | 15 | 0.4917  | 3.4597 | 0.8870 | 0.38 |
| SA | lateraloccipital | rs4622900  | C | T | C | T | -0.0125 | 0.0023 | 2.99E-08 | 15 | 0.7807  | 3.4237 | 0.8196 | 0.44 |
| SA | lateraloccipital | rs4899502  | G | A | G | A | 0.0136  | 0.0024 | 1.83E-08 | 14 | 0.6097  | 3.6580 | 0.8676 | 0.31 |
| SA | lateraloccipital | rs4936289  | G | A | G | A | 0.0131  | 0.0023 | 1.33E-08 | 15 | 3.3537  | 3.5880 | 0.3499 | 0.38 |
| SA | lateraloccipital | rs55910701 | T | C | T | C | -0.0179 | 0.0026 | 1.05E-11 | 17 | 4.6873  | 4.0095 | 0.2424 | 0.24 |
| SA | lateraloccipital | rs56049037 | A | G | A | G | -0.0159 | 0.0025 | 1.64E-10 | 17 | 8.0244  | 4.0757 | 0.0490 | 0.29 |
| SA | lateraloccipital | rs56076457 | C | T | C | T | -0.0127 | 0.0022 | 1.58E-08 | 16 | -3.6824 | 3.3998 | 0.2788 | 0.47 |
| SA | lateraloccipital | rs6131942  | A | G | A | G | -0.0136 | 0.0023 | 2.31E-09 | 17 | 0.3497  | 3.4502 | 0.9193 | 0.42 |
| SA | lateraloccipital | rs61773390 | T | G | T | G | 0.0258  | 0.0028 | 5.34E-20 | 26 | 4.2734  | 4.3153 | 0.3220 | 0.20 |
| SA | lateraloccipital | rs62172117 | A | G | A | G | -0.0159 | 0.0023 | 1.08E-11 | 21 | -1.5655 | 3.5550 | 0.6597 | 0.36 |
| SA | lateraloccipital | rs62182115 | T | C | T | C | -0.0135 | 0.0024 | 1.04E-08 | 15 | 2.0047  | 3.7098 | 0.5889 | 0.34 |
| SA | lateraloccipital | rs6441371  | A | C | A | C | 0.0140  | 0.0023 | 5.54E-10 | 19 | 2.1101  | 3.3620 | 0.5303 | 0.48 |
| SA | lateraloccipital | rs6778003  | T | G | T | G | 0.0152  | 0.0025 | 6.05E-10 | 16 | 0.6080  | 4.0412 | 0.8804 | 0.29 |
| SA | lateraloccipital | rs6990077  | T | C | T | C | -0.0185 | 0.0027 | 7.90E-12 | 16 | 4.5834  | 4.1440 | 0.2687 | 0.22 |
| SA | lateraloccipital | rs7196720  | T | C | T | C | 0.0125  | 0.0022 | 2.23E-08 | 16 | 3.7591  | 3.4539 | 0.2764 | 0.49 |
| SA | lateraloccipital | rs72720396 | G | A | G | A | 0.0223  | 0.0027 | 4.36E-17 | 25 | 3.0619  | 4.1952 | 0.4655 | 0.23 |
| SA | lateraloccipital | rs7304278  | A | G | A | G | -0.0149 | 0.0025 | 3.59E-09 | 14 | -3.2783 | 3.7555 | 0.3827 | 0.28 |
| SA | lateraloccipital | rs73095857 | T | G | T | G | 0.0134  | 0.0023 | 3.52E-09 | 17 | 5.2471  | 3.5778 | 0.1425 | 0.42 |
| SA | lateraloccipital | rs7313852  | A | G | A | G | -0.0226 | 0.0023 | 2.52E-23 | 49 | -6.2528 | 3.5420 | 0.0775 | 0.44 |



|    |                  |             |   |   |   |   |         |        |          |    |         |        |        |      |
|----|------------------|-------------|---|---|---|---|---------|--------|----------|----|---------|--------|--------|------|
| SA | lateraloccipital | rs735459    | C | T | C | T | 0.0155  | 0.0024 | 5.25E-11 | 20 | 1.0928  | 3.6061 | 0.7619 | 0.36 |
| SA | lateraloccipital | rs7598252   | G | A | G | A | -0.0128 | 0.0023 | 2.00E-08 | 16 | 3.5042  | 3.4098 | 0.3041 | 0.47 |
| SA | lateraloccipital | rs7783012   | G | A | G | A | -0.0140 | 0.0023 | 1.09E-09 | 18 | -2.0576 | 3.4517 | 0.5511 | 0.41 |
| SA | lateraloccipital | rs77960     | A | G | A | G | 0.0136  | 0.0024 | 1.22E-08 | 14 | -3.2358 | 3.6609 | 0.3768 | 0.33 |
| SA | lateraloccipital | rs7925560   | A | G | A | G | -0.0173 | 0.0027 | 6.54E-11 | 15 | -6.8496 | 3.9633 | 0.0839 | 0.23 |
| SA | lateraloccipital | rs7959983   | C | T | C | T | 0.0151  | 0.0023 | 3.17E-11 | 21 | -5.1883 | 3.4612 | 0.1339 | 0.40 |
| SA | lateraloccipital | rs8072507   | C | T | C | T | 0.0150  | 0.0025 | 1.37E-09 | 15 | -2.5651 | 3.6839 | 0.4862 | 0.29 |
| SA | lateraloccipital | rs9348050   | T | C | T | C | 0.0133  | 0.0022 | 3.44E-09 | 17 | -6.4360 | 3.4459 | 0.0618 | 0.49 |
| SA | lateraloccipital | rs9395520   | T | C | T | C | 0.0180  | 0.0024 | 1.59E-13 | 23 | -2.1889 | 3.6552 | 0.5493 | 0.30 |
| SA | lateraloccipital | rs9597250   | A | C | A | C | -0.0178 | 0.0029 | 6.12E-10 | 12 | 4.1348  | 4.2677 | 0.3326 | 0.19 |
| SA | lateraloccipital | rs974552    | G | A | G | A | 0.0192  | 0.0028 | 1.48E-11 | 14 | 4.8232  | 4.5442 | 0.2885 | 0.19 |
| SA | lateraloccipital | rs9795439   | A | G | A | G | 0.0163  | 0.0028 | 6.68E-09 | 11 | 5.6156  | 4.9745 | 0.2590 | 0.20 |
| SA | lateraloccipital | rs9964420   | A | C | A | C | -0.0202 | 0.0025 | 2.46E-16 | 28 | -2.3718 | 3.7703 | 0.5293 | 0.30 |
| TH | frontalpole      | rs10518440  | G | A | G | A | 0.0310  | 0.0030 | 2.07E-24 | 28 | -0.0019 | 0.0027 | 0.4754 | 0.16 |
| TH | frontalpole      | rs10737452  | C | T | C | T | 0.0159  | 0.0023 | 6.30E-12 | 22 | -0.0021 | 0.0021 | 0.3044 | 0.38 |
| TH | frontalpole      | rs112439757 | T | C | T | C | -0.0219 | 0.0029 | 6.57E-14 | 17 | -0.0017 | 0.0026 | 0.5200 | 0.18 |
| TH | frontalpole      | rs12206116  | A | G | A | G | 0.0126  | 0.0023 | 4.40E-08 | 14 | -0.0030 | 0.0020 | 0.1426 | 0.40 |
| TH | frontalpole      | rs12431576  | C | T | C | T | -0.0148 | 0.0024 | 7.63E-10 | 17 | 0.0009  | 0.0022 | 0.6690 | 0.33 |
| TH | frontalpole      | rs12927162  | G | A | G | A | -0.0234 | 0.0025 | 9.89E-21 | 35 | 0.0039  | 0.0025 | 0.1186 | 0.28 |
| TH | frontalpole      | rs12956276  | A | G | A | G | 0.0132  | 0.0023 | 1.45E-08 | 15 | 0.0019  | 0.0021 | 0.3636 | 0.35 |
| TH | frontalpole      | rs1323591   | T | C | T | C | -0.0143 | 0.0024 | 1.64E-09 | 16 | 0.0027  | 0.0022 | 0.2208 | 0.32 |
| TH | frontalpole      | rs139911    | C | T | C | T | 0.0183  | 0.0023 | 9.94E-16 | 31 | -0.0028 | 0.0020 | 0.1633 | 0.42 |
| TH | frontalpole      | rs1421085   | C | T | C | T | 0.0215  | 0.0023 | 4.08E-21 | 43 | -0.0043 | 0.0020 | 0.0321 | 0.40 |
| TH | frontalpole      | rs17448682  | T | C | T | C | 0.0160  | 0.0027 | 1.75E-09 | 13 | 0.0015  | 0.0024 | 0.5238 | 0.23 |
| TH | frontalpole      | rs17697212  | C | T | C | T | -0.0162 | 0.0028 | 1.02E-08 | 10 | 0.0020  | 0.0025 | 0.4254 | 0.20 |

|    |             |            |   |   |   |   |         |        |          |    |         |        |        |      |
|----|-------------|------------|---|---|---|---|---------|--------|----------|----|---------|--------|--------|------|
| TH | frontalpole | rs202157   | C | T | C | T | 0.0193  | 0.0025 | 4.42E-15 | 26 | 0.0008  | 0.0022 | 0.7114 | 0.30 |
| TH | frontalpole | rs2232839  | T | C | T | C | -0.0211 | 0.0028 | 4.81E-14 | 19 | -0.0003 | 0.0028 | 0.9044 | 0.21 |
| TH | frontalpole | rs2291589  | G | T | G | T | -0.0165 | 0.0023 | 8.13E-13 | 24 | 0.0018  | 0.0021 | 0.3887 | 0.38 |
| TH | frontalpole | rs2653349  | A | G | A | G | 0.0295  | 0.0027 | 4.50E-27 | 39 | -0.0004 | 0.0025 | 0.8701 | 0.21 |
| TH | frontalpole | rs2701524  | C | T | C | T | -0.0126 | 0.0023 | 4.36E-08 | 15 | 0.0025  | 0.0021 | 0.2304 | 0.41 |
| TH | frontalpole | rs2794682  | T | C | T | C | 0.0170  | 0.0023 | 9.34E-14 | 27 | 0.0015  | 0.0021 | 0.4582 | 0.40 |
| TH | frontalpole | rs2881955  | T | C | T | C | 0.0144  | 0.0025 | 8.59E-09 | 13 | -0.0007 | 0.0022 | 0.7664 | 0.28 |
| TH | frontalpole | rs2916142  | T | C | T | C | 0.0135  | 0.0023 | 4.41E-09 | 17 | -0.0026 | 0.0020 | 0.1977 | 0.46 |
| TH | frontalpole | rs3100052  | A | G | A | G | 0.0126  | 0.0023 | 4.35E-08 | 14 | -0.0016 | 0.0021 | 0.4289 | 0.39 |
| TH | frontalpole | rs34571177 | G | T | G | T | -0.0174 | 0.0029 | 2.68E-09 | 10 | -0.0002 | 0.0026 | 0.9354 | 0.18 |
| TH | frontalpole | rs35376824 | G | A | G | A | -0.0161 | 0.0026 | 1.12E-09 | 13 | 0.0036  | 0.0024 | 0.1348 | 0.23 |
| TH | frontalpole | rs35935113 | C | T | C | T | -0.0124 | 0.0023 | 3.59E-08 | 15 | 0.0012  | 0.0020 | 0.5407 | 0.45 |
| TH | frontalpole | rs36117029 | G | A | G | A | 0.0129  | 0.0024 | 3.76E-08 | 14 | 0.0027  | 0.0021 | 0.2002 | 0.36 |
| TH | frontalpole | rs3808477  | T | C | T | C | 0.0174  | 0.0025 | 3.30E-12 | 20 | -0.0004 | 0.0022 | 0.8512 | 0.28 |
| TH | frontalpole | rs4241964  | G | T | G | T | 0.0160  | 0.0023 | 1.41E-12 | 25 | -0.0007 | 0.0021 | 0.7299 | 0.48 |
| TH | frontalpole | rs4245555  | C | T | C | T | 0.0173  | 0.0023 | 6.13E-14 | 27 | 0.0048  | 0.0020 | 0.0170 | 0.41 |
| TH | frontalpole | rs4549082  | C | T | C | T | 0.0170  | 0.0022 | 3.61E-14 | 29 | -0.0013 | 0.0021 | 0.5549 | 0.48 |
| TH | frontalpole | rs4550384  | G | T | G | T | -0.0146 | 0.0026 | 2.49E-08 | 11 | -0.0005 | 0.0023 | 0.8386 | 0.24 |
| TH | frontalpole | rs4588790  | T | C | T | C | -0.0130 | 0.0023 | 1.84E-08 | 15 | -0.0020 | 0.0020 | 0.3234 | 0.38 |
| TH | frontalpole | rs4622900  | C | T | C | T | -0.0125 | 0.0023 | 2.99E-08 | 15 | 0.0013  | 0.0020 | 0.5317 | 0.44 |
| TH | frontalpole | rs4899502  | G | A | G | A | 0.0136  | 0.0024 | 1.83E-08 | 14 | 0.0017  | 0.0021 | 0.4290 | 0.31 |
| TH | frontalpole | rs4936289  | G | A | G | A | 0.0131  | 0.0023 | 1.33E-08 | 15 | -0.0024 | 0.0021 | 0.2484 | 0.38 |
| TH | frontalpole | rs55910701 | T | C | T | C | -0.0179 | 0.0026 | 1.05E-11 | 17 | -0.0013 | 0.0023 | 0.5734 | 0.24 |
| TH | frontalpole | rs56049037 | A | G | A | G | -0.0159 | 0.0025 | 1.64E-10 | 17 | 0.0018  | 0.0024 | 0.4534 | 0.29 |
| TH | frontalpole | rs56076457 | C | T | C | T | -0.0127 | 0.0022 | 1.58E-08 | 16 | 0.0006  | 0.0020 | 0.7768 | 0.47 |

|    |             |            |   |   |   |   |         |        |          |    |         |        |        |      |
|----|-------------|------------|---|---|---|---|---------|--------|----------|----|---------|--------|--------|------|
| TH | frontalpole | rs6131942  | A | G | A | G | -0.0136 | 0.0023 | 2.31E-09 | 17 | -0.0012 | 0.0020 | 0.5436 | 0.42 |
| TH | frontalpole | rs61773390 | T | G | T | G | 0.0258  | 0.0028 | 5.34E-20 | 26 | -0.0017 | 0.0025 | 0.5035 | 0.20 |
| TH | frontalpole | rs62172117 | A | G | A | G | -0.0159 | 0.0023 | 1.08E-11 | 21 | -0.0003 | 0.0021 | 0.8694 | 0.36 |
| TH | frontalpole | rs62182115 | T | C | T | C | -0.0135 | 0.0024 | 1.04E-08 | 15 | -0.0011 | 0.0022 | 0.5969 | 0.34 |
| TH | frontalpole | rs6441371  | A | C | A | C | 0.0140  | 0.0023 | 5.54E-10 | 19 | -0.0004 | 0.0020 | 0.8539 | 0.48 |
| TH | frontalpole | rs6778003  | T | G | T | G | 0.0152  | 0.0025 | 6.05E-10 | 16 | 0.0029  | 0.0023 | 0.2201 | 0.29 |
| TH | frontalpole | rs6990077  | T | C | T | C | -0.0185 | 0.0027 | 7.90E-12 | 16 | 0.0000  | 0.0024 | 0.9889 | 0.22 |
| TH | frontalpole | rs7196720  | T | C | T | C | 0.0125  | 0.0022 | 2.23E-08 | 16 | 0.0001  | 0.0020 | 0.9688 | 0.49 |
| TH | frontalpole | rs7304278  | A | G | A | G | -0.0149 | 0.0025 | 3.59E-09 | 14 | -0.0008 | 0.0022 | 0.7120 | 0.28 |
| TH | frontalpole | rs73095857 | T | G | T | G | 0.0134  | 0.0023 | 3.52E-09 | 17 | -0.0004 | 0.0021 | 0.8622 | 0.42 |
| TH | frontalpole | rs7313852  | A | G | A | G | -0.0226 | 0.0023 | 2.52E-23 | 49 | 0.0024  | 0.0021 | 0.2579 | 0.44 |
| TH | frontalpole | rs735459   | C | T | C | T | 0.0155  | 0.0024 | 5.25E-11 | 20 | -0.0004 | 0.0021 | 0.8682 | 0.36 |
| TH | frontalpole | rs7598252  | G | A | G | A | -0.0128 | 0.0023 | 2.00E-08 | 16 | 0.0011  | 0.0020 | 0.5655 | 0.47 |
| TH | frontalpole | rs7783012  | G | A | G | A | -0.0140 | 0.0023 | 1.09E-09 | 18 | 0.0013  | 0.0020 | 0.5240 | 0.41 |
| TH | frontalpole | rs77960    | A | G | A | G | 0.0136  | 0.0024 | 1.22E-08 | 14 | -0.0006 | 0.0021 | 0.7705 | 0.33 |
| TH | frontalpole | rs8072507  | C | T | C | T | 0.0150  | 0.0025 | 1.37E-09 | 15 | 0.0027  | 0.0022 | 0.2031 | 0.29 |
| TH | frontalpole | rs9348050  | T | C | T | C | 0.0133  | 0.0022 | 3.44E-09 | 17 | -0.0053 | 0.0020 | 0.0091 | 0.49 |
| TH | frontalpole | rs9395520  | T | C | T | C | 0.0180  | 0.0024 | 1.59E-13 | 23 | 0.0014  | 0.0021 | 0.5005 | 0.30 |
| TH | frontalpole | rs9597250  | A | C | A | C | -0.0178 | 0.0029 | 6.12E-10 | 12 | -0.0012 | 0.0025 | 0.6253 | 0.19 |
| TH | frontalpole | rs974552   | G | A | G | A | 0.0192  | 0.0028 | 1.48E-11 | 14 | -0.0035 | 0.0027 | 0.1904 | 0.19 |
| TH | frontalpole | rs9795439  | A | G | A | G | 0.0163  | 0.0028 | 6.68E-09 | 11 | -0.0006 | 0.0029 | 0.8482 | 0.20 |
| TH | frontalpole | rs9964420  | A | C | A | C | -0.0202 | 0.0025 | 2.46E-16 | 28 | 0.0033  | 0.0022 | 0.1377 | 0.30 |

**Table S2. The details of genetic instruments predicting morningness and cortical SA/TH**

| The details of genetic instruments predicting insomnia and cortical SA/TH |                 |            |             |             |            |                      |               |             |               |       |              |            |              |      |
|---------------------------------------------------------------------------|-----------------|------------|-------------|-------------|------------|----------------------|---------------|-------------|---------------|-------|--------------|------------|--------------|------|
| cortical<br>SA/TH                                                         | Exposure        | SNP        | EA.exposure | OA.exposure | EA.outcome | other_allele.outcome | beta.exposure | se.exposure | pval.exposure | F     | beta.outcome | se.outcome | pval.outcome | MAF  |
| TH                                                                        | parahippocampal | rs11693221 | T           | C           | T          | C                    | 1.1310        | 0.0127      | 3.14E-22      | 634   | 0.0090       | 0.0072     | 0.2093       | 0.04 |
| TH                                                                        | parahippocampal | rs1456193  | T           | C           | T          | C                    | 0.9633        | 0.0067      | 2.13E-08      | 6248  | 0.0011       | 0.0031     | 0.7290       | 0.18 |
| TH                                                                        | parahippocampal | rs370771   | G           | T           | G          | T                    | 0.9660        | 0.0051      | 1.48E-11      | 18484 | -0.0007      | 0.0025     | 0.7856       | 0.45 |
| TH                                                                        | parahippocampal | rs4073582  | A           | G           | A          | G                    | 0.9693        | 0.0053      | 4.67E-09      | 15911 | -0.0004      | 0.0025     | 0.8810       | 0.36 |
| TH                                                                        | parahippocampal | rs4986172  | T           | C           | T          | C                    | 1.0380        | 0.0054      | 5.20E-12      | 17670 | 0.0034       | 0.0025     | 0.1689       | 0.34 |
| TH                                                                        | parahippocampal | rs55683518 | G           | T           | G          | T                    | 0.9711        | 0.0053      | 3.55E-08      | 16171 | 0.0047       | 0.0024     | 0.0560       | 0.37 |
| TH                                                                        | parahippocampal | rs6938026  | G           | A           | G          | A                    | 1.0380        | 0.0062      | 2.72E-09      | 9384  | 0.0002       | 0.0029     | 0.9466       | 0.21 |
| TH                                                                        | parahippocampal | rs6984111  | C           | T           | C          | T                    | 1.0440        | 0.0074      | 4.25E-09      | 5455  | 0.0053       | 0.0033     | 0.1066       | 0.16 |
| TH                                                                        | parahippocampal | rs77217059 | A           | G           | A          | G                    | 0.9592        | 0.0072      | 8.76E-09      | 4516  | 0.0008       | 0.0033     | 0.8179       | 0.15 |
| TH                                                                        | parahippocampal | rs77960    | A           | G           | A          | G                    | 1.0330        | 0.0054      | 1.66E-09      | 16623 | 0.0032       | 0.0025     | 0.2090       | 0.33 |
| TH                                                                        | parahippocampal | rs9576155  | A           | G           | A          | G                    | 1.0310        | 0.0054      | 9.26E-09      | 17169 | -0.0014      | 0.0028     | 0.6174       | 0.34 |

**Table S3. The details of genetic instruments predicting insomnia and cortical SA/TH**

| The details of genetic instruments predicting ease of getting up and cortical SA/TH |                      |             |                 |                 |                |                |               |             |               |    |                  |                |                  |         |
|-------------------------------------------------------------------------------------|----------------------|-------------|-----------------|-----------------|----------------|----------------|---------------|-------------|---------------|----|------------------|----------------|------------------|---------|
| cortical<br>SA/TH                                                                   | Exposure             | SNP         | EA.exposur<br>e | OA.exposur<br>e | EA.outcom<br>e | OA.outcom<br>e | beta.exposure | se.exposure | pval.exposure | F  | beta.outcom<br>e | se.outcom<br>e | pval.outcom<br>e | MA<br>F |
| SA                                                                                  | lateralorbitofrontal | rs10175975  | T               | C               | T              | C              | 0.0134        | 0.0023      | 3.30E-09      | 35 | -3.5129          | 2.1682         | 0.1052           | 0.18    |
| SA                                                                                  | lateralorbitofrontal | rs10470887  | G               | A               | G              | A              | -0.0095       | 0.0017      | 4.05E-08      | 30 | -0.2230          | 1.7015         | 0.8957           | 0.49    |
| SA                                                                                  | lateralorbitofrontal | rs11229264  | A               | G               | A              | G              | -0.0122       | 0.0019      | 1.43E-10      | 41 | -3.7515          | 1.8451         | 0.0420           | 0.30    |
| SA                                                                                  | lateralorbitofrontal | rs113240734 | A               | G               | A              | G              | 0.0192        | 0.0023      | 2.17E-16      | 67 | 4.1233           | 2.3012         | 0.0732           | 0.16    |
| SA                                                                                  | lateralorbitofrontal | rs11642015  | T               | C               | T              | C              | 0.0115        | 0.0018      | 6.20E-11      | 43 | 0.9359           | 1.7257         | 0.5876           | 0.40    |
| SA                                                                                  | lateralorbitofrontal | rs11643192  | A               | C               | A              | C              | -0.0107       | 0.0018      | 1.30E-09      | 37 | -2.7010          | 1.7405         | 0.1207           | 0.39    |
| SA                                                                                  | lateralorbitofrontal | rs11697690  | C               | T               | C              | T              | 0.0097        | 0.0017      | 2.33E-08      | 31 | 2.1816           | 1.7192         | 0.2044           | 0.47    |
| SA                                                                                  | lateralorbitofrontal | rs12515274  | A               | G               | A              | G              | -0.0123       | 0.0020      | 5.37E-10      | 39 | -1.8198          | 1.9625         | 0.3538           | 0.25    |
| SA                                                                                  | lateralorbitofrontal | rs12601968  | T               | G               | T              | G              | -0.0112       | 0.0018      | 1.16E-09      | 37 | -0.0467          | 1.8366         | 0.9797           | 0.33    |
| SA                                                                                  | lateralorbitofrontal | rs1420607   | A               | G               | A              | G              | 0.0131        | 0.0019      | 1.57E-11      | 45 | 1.7503           | 1.9530         | 0.3701           | 0.27    |

|    |                      |            |   |   |   |   |         |        |          |     |         |        |        |      |
|----|----------------------|------------|---|---|---|---|---------|--------|----------|-----|---------|--------|--------|------|
| SA | lateralorbitofrontal | rs1459192  | T | C | T | C | -0.0102 | 0.0018 | 2.50E-08 | 31  | -1.5453 | 1.7893 | 0.3878 | 0.33 |
| SA | lateralorbitofrontal | rs1606803  | T | C | T | C | 0.0119  | 0.0019 | 3.22E-10 | 40  | -0.9653 | 1.8843 | 0.6084 | 0.29 |
| SA | lateralorbitofrontal | rs16917522 | C | T | C | T | 0.0136  | 0.0022 | 1.12E-09 | 37  | 1.7027  | 2.2180 | 0.4427 | 0.18 |
| SA | lateralorbitofrontal | rs17822102 | G | A | G | A | 0.0111  | 0.0018 | 9.40E-10 | 37  | 1.2039  | 1.7972 | 0.5029 | 0.34 |
| SA | lateralorbitofrontal | rs2037387  | T | C | T | C | 0.0104  | 0.0018 | 3.04E-09 | 35  | -3.9475 | 1.7096 | 0.0209 | 0.42 |
| SA | lateralorbitofrontal | rs2053457  | C | T | C | T | -0.0160 | 0.0020 | 1.29E-15 | 64  | -0.6499 | 1.9463 | 0.7385 | 0.25 |
| SA | lateralorbitofrontal | rs2193749  | T | C | T | C | -0.0097 | 0.0017 | 1.84E-08 | 32  | 2.2765  | 1.7187 | 0.1853 | 0.49 |
| SA | lateralorbitofrontal | rs2653349  | A | G | A | G | 0.0234  | 0.0021 | 8.45E-29 | 124 | 3.8827  | 2.1086 | 0.0656 | 0.21 |
| SA | lateralorbitofrontal | rs3735478  | T | G | T | G | -0.0107 | 0.0019 | 1.57E-08 | 32  | -0.4544 | 1.9184 | 0.8128 | 0.29 |
| SA | lateralorbitofrontal | rs3760185  | T | C | T | C | -0.0111 | 0.0020 | 4.52E-08 | 30  | -1.0921 | 2.1878 | 0.6177 | 0.24 |
| SA | lateralorbitofrontal | rs406952   | C | T | C | T | 0.0101  | 0.0018 | 1.20E-08 | 33  | 2.8727  | 1.7403 | 0.0988 | 0.38 |
| SA | lateralorbitofrontal | rs4483990  | C | A | C | A | -0.0172 | 0.0024 | 6.40E-13 | 52  | 0.3771  | 2.3998 | 0.8751 | 0.15 |
| SA | lateralorbitofrontal | rs4671328  | T | G | T | G | 0.0107  | 0.0018 | 1.06E-09 | 37  | 2.8054  | 1.7354 | 0.1060 | 0.45 |

|    |                      |            |   |   |   |   |         |        |          |    |         |        |        |      |
|----|----------------------|------------|---|---|---|---|---------|--------|----------|----|---------|--------|--------|------|
| SA | lateralorbitofrontal | rs4853283  | G | A | G | A | -0.0143 | 0.0017 | 1.84E-16 | 68 | -2.7920 | 1.7095 | 0.1024 | 0.44 |
| SA | lateralorbitofrontal | rs4884166  | A | G | A | G | -0.0123 | 0.0022 | 1.15E-08 | 33 | -2.7210 | 2.1213 | 0.1996 | 0.20 |
| SA | lateralorbitofrontal | rs4958316  | A | C | A | C | 0.0150  | 0.0019 | 3.69E-15 | 62 | 0.3036  | 1.8740 | 0.8713 | 0.29 |
| SA | lateralorbitofrontal | rs61773374 | G | A | G | A | 0.0165  | 0.0022 | 3.37E-14 | 58 | -3.3091 | 2.1724 | 0.1277 | 0.20 |
| SA | lateralorbitofrontal | rs6575012  | A | G | A | G | -0.0096 | 0.0017 | 2.57E-08 | 31 | 1.1691  | 1.7044 | 0.4927 | 0.48 |
| SA | lateralorbitofrontal | rs6581138  | A | G | A | G | 0.0127  | 0.0020 | 2.30E-10 | 40 | -2.3690 | 2.0752 | 0.2536 | 0.24 |
| SA | lateralorbitofrontal | rs7297799  | T | C | T | C | -0.0128 | 0.0018 | 1.21E-12 | 50 | 0.2444  | 1.8364 | 0.8941 | 0.40 |
| SA | lateralorbitofrontal | rs76048411 | T | C | T | C | 0.0106  | 0.0017 | 8.53E-10 | 38 | -0.0079 | 1.8096 | 0.9965 | 0.48 |
| SA | lateralorbitofrontal | rs77556405 | A | G | A | G | 0.0168  | 0.0023 | 1.59E-13 | 54 | -1.2042 | 2.4250 | 0.6195 | 0.17 |
| SA | lateralorbitofrontal | rs77576965 | T | C | T | C | 0.0109  | 0.0019 | 1.94E-08 | 32 | 0.7692  | 1.8851 | 0.6832 | 0.27 |
| SA | lateralorbitofrontal | rs9399613  | T | C | T | C | -0.0109 | 0.0019 | 1.32E-08 | 32 | -2.4681 | 1.9218 | 0.1991 | 0.29 |
| SA | lateralorbitofrontal | rs9995419  | A | G | A | G | 0.0114  | 0.0020 | 1.50E-08 | 32 | -1.0339 | 1.9769 | 0.6010 | 0.24 |

**Table S4. The details of genetic instruments predicting ease of getting up and cortical SA/TH**

| The details of genetic instruments predicting long sleep and cortical SA/TH |                  |            |             |             |            |            |               |             |               |    |              |            |              |      |
|-----------------------------------------------------------------------------|------------------|------------|-------------|-------------|------------|------------|---------------|-------------|---------------|----|--------------|------------|--------------|------|
| cortical<br>SA/TH                                                           | Exposure         | SNP        | EA.exposure | OA.exposure | EA.outcome | OA.outcome | beta.exposure | se.exposure | pval.exposure | F  | beta.outcome | se.outcome | pval.outcome | EAF  |
| SA                                                                          | isthmuscingulate | rs10899257 | G           | A           | G          | A          | -0.0056       | 0.0010      | 4.60E-08      | 30 | -2.0704      | 1.4808     | 0.1620       | 0.86 |
| SA                                                                          | isthmuscingulate | rs17817288 | A           | G           | A          | G          | 0.0042        | 0.0007      | 8.90E-09      | 33 | 0.7948       | 1.0195     | 0.4356       | 0.52 |
| SA                                                                          | isthmuscingulate | rs3751046  | A           | G           | A          | G          | -0.0058       | 0.0010      | 2.00E-08      | 32 | -0.2995      | 1.4518     | 0.8366       | 0.85 |
| SA                                                                          | isthmuscingulate | rs6737318  | A           | G           | A          | G          | -0.0064       | 0.0009      | 3.40E-13      | 53 | -3.2236      | 1.2655     | 0.0109       | 0.78 |
| SA                                                                          | isthmuscingulate | rs75458655 | C           | T           | C          | T          | -0.0167       | 0.0024      | 5.40E-12      | 48 | -1.7229      | 4.6509     | 0.7111       | 0.98 |
| SA                                                                          | parsopercularis  | rs10899257 | G           | A           | G          | A          | -0.0056       | 0.0010      | 4.60E-08      | 30 | 1.0671       | 2.3435     | 0.6489       | 0.86 |
| SA                                                                          | parsopercularis  | rs17817288 | A           | G           | A          | G          | 0.0042        | 0.0007      | 8.90E-09      | 33 | 2.4141       | 1.6134     | 0.1346       | 0.52 |
| SA                                                                          | parsopercularis  | rs3751046  | A           | G           | A          | G          | -0.0058       | 0.0010      | 2.00E-08      | 32 | -3.2150      | 2.2963     | 0.1615       | 0.85 |
| SA                                                                          | parsopercularis  | rs6737318  | A           | G           | A          | G          | -0.0064       | 0.0009      | 3.40E-13      | 53 | -3.8391      | 2.0029     | 0.0553       | 0.78 |
| SA                                                                          | parsopercularis  | rs75458655 | C           | T           | C          | T          | -0.0167       | 0.0024      | 5.40E-12      | 48 | -5.0283      | 7.4024     | 0.4970       | 0.98 |

**Table S5. The details of genetic instruments predicting long sleep and cortical SA/TH**

| The Association of sleep traits and cortical SA/TH |                |                  |                           |      |          |          |        |           |          |
|----------------------------------------------------|----------------|------------------|---------------------------|------|----------|----------|--------|-----------|----------|
| Outcome                                            | Cortical SA/TH | Exposure         | Method                    | NSNP | Beta     | SE       | Pval   | Lowci95   | Up95     |
| Morning                                            | SA             | lateraloccipital | MR Egger                  | 67   | 109.1841 | 146.4568 | 0.4587 | -374.5959 | 277.5089 |
| Morning                                            | SA             | lateraloccipital | Weighted median           | 67   | 118.8897 | 42.6079  | 0.0053 | -183.6778 | 11.2631  |
| Morning                                            | SA             | lateraloccipital | Inverse variance weighted | 67   | 88.9982  | 31.8073  | 0.0051 | -150.4952 | -4.8863  |
| Morning                                            | SA             | lateraloccipital | Simple mode               | 67   | 183.8995 | 105.7309 | 0.0866 | -309.4185 | 134.2587 |



|            |    |                   |                           |    |            |          |        |            |          |
|------------|----|-------------------|---------------------------|----|------------|----------|--------|------------|----------|
| Morning    | SA | lateraloccipital  | Weighted mode             | 67 | 163.7421   | 85.9640  | 0.0612 | -280.1732  | 129.1900 |
| Morning    | SA | inferiorparietal  | MR Egger                  | 59 | -48.5435   | 166.3533 | 0.7715 | -374.5959  | 277.5089 |
| Morning    | SA | inferiorparietal  | Weighted median           | 59 | -86.2074   | 49.8433  | 0.0837 | -183.9002  | 11.4855  |
| Morning    | SA | inferiorparietal  | Inverse variance weighted | 59 | -77.6908   | 37.1451  | 0.0365 | -150.4952  | -4.8863  |
| Morning    | SA | inferiorparietal  | Simple mode               | 59 | -87.5799   | 117.3736 | 0.4586 | -317.6321  | 142.4723 |
| Morning    | SA | inferiorparietal  | Weighted mode             | 59 | -75.4916   | 106.3755 | 0.4808 | -283.9876  | 133.0044 |
| Morning    | SA | cuneus            | MR Egger                  | 67 | 21.5314    | 52.3210  | 0.6820 | -81.0177   | 124.0805 |
| Morning    | SA | cuneus            | Weighted median           | 67 | 31.9273    | 15.9365  | 0.0451 | 0.6917     | 63.1628  |
| Morning    | SA | cuneus            | Inverse variance weighted | 67 | 32.6252    | 11.3640  | 0.0041 | 10.3518    | 54.8986  |
| Morning    | SA | cuneus            | Simple mode               | 67 | 18.7639    | 38.2628  | 0.6255 | -56.2312   | 93.7591  |
| Morning    | SA | cuneus            | Weighted mode             | 67 | 18.7639    | 33.5967  | 0.5784 | -47.0857   | 84.6135  |
| Morning    | TH | frontalpole       | MR Egger                  | 59 | -0.0678    | 0.0769   | 0.3818 | -0.2186    | 0.0830   |
| Morning    | TH | frontalpole       | Weighted median           | 59 | -0.0445    | 0.0255   | 0.0808 | -0.0945    | 0.0055   |
| Morning    | TH | frontalpole       | Inverse variance weighted | 59 | -0.0388    | 0.0173   | 0.0248 | -0.0727    | -0.0049  |
| Morning    | TH | frontalpole       | Simple mode               | 59 | -0.0526    | 0.0565   | 0.3559 | -0.1634    | 0.0582   |
| Morning    | TH | frontalpole       | Weighted mode             | 59 | -0.0545    | 0.0548   | 0.3240 | -0.1619    | 0.0529   |
| Shortsleep | TH | frontalpole       | MR Egger                  | 20 | -0.6244    | 0.3622   | 0.1019 | -1.3344    | 0.0856   |
| Shortsleep | TH | frontalpole       | Weighted median           | 20 | -0.1337    | 0.1062   | 0.2081 | -0.3418    | 0.0745   |
| Shortsleep | TH | frontalpole       | Inverse variance weighted | 20 | -0.1793    | 0.0764   | 0.0189 | -0.3290    | -0.0296  |
| Shortsleep | TH | frontalpole       | Simple mode               | 20 | -0.1293    | 0.2099   | 0.5451 | -0.5407    | 0.2821   |
| Shortsleep | TH | frontalpole       | Weighted mode             | 20 | -0.1360    | 0.2080   | 0.5211 | -0.5437    | 0.2717   |
| Shortsleep | SA | inferiorparietal_ | MR Egger                  | 20 | -1138.9697 | 702.8486 | 0.1225 | -2516.5529 | 238.6135 |
| Shortsleep | SA | inferiorparietal_ | Weighted median           | 20 | -291.6344  | 205.1888 | 0.1552 | -693.8046  | 110.5357 |
| Shortsleep | SA | inferiorparietal_ | Inverse variance weighted | 20 | -329.5500  | 147.4514 | 0.0254 | -618.5548  | -40.5453 |
| Shortsleep | SA | inferiorparietal_ | Simple mode               | 20 | -224.8782  | 389.7923 | 0.5708 | -988.8711  | 539.1147 |

|            |    |                   |                           |    |           |          |        |            |           |
|------------|----|-------------------|---------------------------|----|-----------|----------|--------|------------|-----------|
| Shortsleep | SA | inferiorparietal_ | Weighted mode             | 20 | -254.7046 | 380.6179 | 0.5114 | -1000.7157 | 491.3064  |
| Shortsleep | SA | lateraloccipital  | MR Egger                  | 17 | 672.9334  | 741.1285 | 0.3782 | -779.6785  | 2125.5452 |
| Shortsleep | SA | lateraloccipital  | Weighted median           | 17 | 423.8984  | 196.4640 | 0.0310 | 38.8289    | 808.9678  |
| Shortsleep | SA | lateraloccipital  | Inverse variance weighted | 17 | 394.3693  | 146.1629 | 0.0070 | 107.8900   | 680.8486  |
| Shortsleep | SA | lateraloccipital  | Simple mode               | 17 | 663.9841  | 388.0322 | 0.1064 | -96.5589   | 1424.5271 |
| Shortsleep | SA | lateraloccipital  | Weighted mode             | 17 | 465.7023  | 335.3087 | 0.1839 | -191.5027  | 1122.9073 |
| Shortsleep | SA | middletemporal_   | MR Egger                  | 16 | 661.5468  | 515.5059 | 0.2202 | -348.8446  | 1671.9383 |
| Shortsleep | SA | middletemporal_   | Weighted median           | 16 | 292.7147  | 128.5795 | 0.0228 | 40.6988    | 544.7305  |
| Shortsleep | SA | middletemporal_   | Inverse variance weighted | 16 | 200.1703  | 95.5122  | 0.0361 | 12.9664    | 387.3742  |
| Shortsleep | SA | middletemporal_   | Simple mode               | 16 | 316.5569  | 209.4736 | 0.1515 | -94.0114   | 727.1252  |
| Shortsleep | SA | middletemporal_   | Weighted mode             | 16 | 307.3440  | 194.3347 | 0.1346 | -73.5521   | 688.2401  |
| Shortsleep | TH | middletemporal_   | MR Egger                  | 17 | 0.2433    | 0.1780   | 0.1918 | -0.1056    | 0.5922    |
| Shortsleep | TH | middletemporal_   | Weighted median           | 17 | 0.1375    | 0.0538   | 0.0106 | 0.0320     | 0.2430    |
| Shortsleep | TH | middletemporal_   | Inverse variance weighted | 17 | 0.1210    | 0.0388   | 0.0018 | 0.0450     | 0.1970    |
| Shortsleep | TH | middletemporal_   | Simple mode               | 17 | 0.1688    | 0.1019   | 0.1172 | -0.0310    | 0.3686    |
| Shortsleep | TH | middletemporal_   | Weighted mode             | 17 | 0.1524    | 0.0978   | 0.1386 | -0.0392    | 0.3441    |
| Shortsleep | TH | paracentral       | MR Egger                  | 17 | 0.2433    | 0.1780   | 0.1918 | -0.1056    | 0.5922    |
| Shortsleep | TH | paracentral       | Weighted median           | 17 | 0.1375    | 0.0538   | 0.0106 | 0.0320     | 0.2430    |
| Shortsleep | TH | paracentral       | Inverse variance weighted | 17 | 0.1210    | 0.0388   | 0.0018 | 0.0450     | 0.1970    |
| Shortsleep | TH | paracentral       | Simple mode               | 17 | 0.1688    | 0.1019   | 0.1172 | -0.0310    | 0.3686    |
| Shortsleep | TH | paracentral       | Weighted mode             | 17 | 0.1524    | 0.0978   | 0.1386 | -0.0392    | 0.3441    |
| Shortsleep | TH | parahippocampal   | MR Egger                  | 20 | -0.1440   | 0.4301   | 0.7416 | -0.9869    | 0.6989    |
| Shortsleep | TH | parahippocampal   | Weighted median           | 20 | -0.2090   | 0.1194   | 0.0801 | -0.4430    | 0.0251    |
| Shortsleep | TH | parahippocampal   | Inverse variance weighted | 20 | -0.2472   | 0.0904   | 0.0063 | -0.4244    | -0.0699   |
| Shortsleep | TH | parahippocampal   | Simple mode               | 20 | -0.1933   | 0.2128   | 0.3751 | -0.6105    | 0.2238    |

|                    |    |                      |                           |    |          |          |        |           |           |
|--------------------|----|----------------------|---------------------------|----|----------|----------|--------|-----------|-----------|
| Shortsleep         | TH | parahippocampal      | Weighted mode             | 20 | -0.1428  | 0.1968   | 0.4769 | -0.5286   | 0.2430    |
| Shortsleep         | TH | superiortemporal     | MR Egger                  | 20 | 0.2165   | 0.1741   | 0.2298 | -0.1248   | 0.5578    |
| Shortsleep         | TH | superiortemporal     | Weighted median           | 20 | 0.1506   | 0.0518   | 0.0036 | 0.0491    | 0.2521    |
| Shortsleep         | TH | superiortemporal     | Inverse variance weighted | 20 | 0.0900   | 0.0362   | 0.0130 | 0.0190    | 0.1611    |
| Shortsleep         | TH | superiortemporal     | Simple mode               | 20 | 0.1722   | 0.0988   | 0.0974 | -0.0214   | 0.3658    |
| Shortsleep         | TH | superiortemporal     | Weighted mode             | 20 | 0.1705   | 0.1043   | 0.1186 | -0.0339   | 0.3748    |
| Insomnia           | TH | parahippocampal      | MR Egger                  | 11 | 0.0233   | 0.0225   | 0.3272 | -0.0208   | 0.0674    |
| Insomnia           | TH | parahippocampal      | Weighted median           | 11 | 0.0011   | 0.0011   | 0.3266 | -0.0011   | 0.0033    |
| Insomnia           | TH | parahippocampal      | Inverse variance weighted | 11 | 0.0018   | 0.0009   | 0.0374 | 0.0001    | 0.0034    |
| Insomnia           | TH | parahippocampal      | Simple mode               | 11 | 0.0003   | 0.0020   | 0.8979 | -0.0037   | 0.0043    |
| Insomnia           | TH | parahippocampal      | Weighted mode             | 11 | 0.0002   | 0.0019   | 0.9204 | -0.0035   | 0.0039    |
| Ease of getting up | SA | lateralorbitofrontal | MR Egger                  | 35 | 119.2731 | 126.3023 | 0.3519 | -128.2794 | 366.8257  |
| Ease of getting up | SA | lateralorbitofrontal | Weighted median           | 35 | 76.6210  | 37.9060  | 0.0432 | 2.3253    | 150.9167  |
| Ease of getting up | SA | lateralorbitofrontal | Inverse variance weighted | 35 | 57.6526  | 27.7510  | 0.0378 | 3.2606    | 112.0446  |
| Ease of getting up | SA | lateralorbitofrontal | Simple mode               | 35 | 103.5609 | 81.9329  | 0.2148 | -57.0277  | 264.1494  |
| Ease of getting up | SA | lateralorbitofrontal | Weighted mode             | 35 | 139.2143 | 72.5811  | 0.0635 | -3.0447   | 281.4734  |
| Long sleep         | SA | isthmuscingulate     | MR Egger                  | 5  | 228.6007 | 353.2287 | 0.5636 | -463.7276 | 920.9290  |
| Long sleep         | SA | isthmuscingulate     | Weighted median           | 5  | 234.1324 | 138.3513 | 0.0906 | -37.0362  | 505.3010  |
| Long sleep         | SA | isthmuscingulate     | Inverse variance weighted | 5  | 274.9328 | 108.1136 | 0.0110 | 63.0301   | 486.8354  |
| Long sleep         | SA | isthmuscingulate     | Simple mode               | 5  | 132.5394 | 196.5693 | 0.5371 | -252.7364 | 517.8151  |
| Long sleep         | SA | isthmuscingulate     | Weighted mode             | 5  | 134.8758 | 203.9808 | 0.5446 | -264.9267 | 534.6782  |
| Long sleep         | SA | parsopercularis      | MR Egger                  | 5  | 252.8421 | 561.3255 | 0.6830 | -847.3558 | 1353.0401 |
| Long sleep         | SA | parsopercularis      | Weighted median           | 5  | 564.7283 | 205.0843 | 0.0059 | 162.7631  | 966.6934  |
| Long sleep         | SA | parsopercularis      | Inverse variance weighted | 5  | 409.0325 | 171.2302 | 0.0169 | 73.4213   | 744.6437  |
| Long sleep         | SA | parsopercularis      | Simple mode               | 5  | 577.9232 | 306.1830 | 0.1321 | -22.1955  | 1178.0419 |

|            |    |                 |               |   |          |          |        |         |           |
|------------|----|-----------------|---------------|---|----------|----------|--------|---------|-----------|
| Long sleep | SA | parsopercularis | Weighted mode | 5 | 582.0416 | 282.1081 | 0.1081 | 29.1098 | 1134.9734 |
|------------|----|-----------------|---------------|---|----------|----------|--------|---------|-----------|

**Table S6. The Association of sleep traits and cortical SA/TH**

| The heterogeneity (cochrane's Q) of the mr results of sleep traits and cortical SA/TH |             |                  |                           |         |        |
|---------------------------------------------------------------------------------------|-------------|------------------|---------------------------|---------|--------|
| cortical SA/TH                                                                        | Outcome     | Exposure         | Method                    | Q       | Q_pval |
| TH                                                                                    | Short sleep | frontalpole      | MR Egger                  | 15.1445 | 0.6520 |
| TH                                                                                    | Short sleep | frontalpole      | Inverse variance weighted | 16.7243 | 0.6085 |
| SA                                                                                    | Short sleep | inferiorparietal | MR Egger                  | 15.6547 | 0.6166 |
| SA                                                                                    | Short sleep | inferiorparietal | Inverse variance weighted | 17.0420 | 0.5870 |
| TH                                                                                    | Short sleep | parahippocampal  | MR Egger                  | 13.4554 | 0.7638 |
| TH                                                                                    | Short sleep | parahippocampal  | Inverse variance weighted | 13.5156 | 0.8112 |
| TH                                                                                    | Short sleep | paracentral      | MR Egger                  | 12.6652 | 0.6281 |
| TH                                                                                    | Short sleep | paracentral      | Inverse variance weighted | 12.7070 | 0.6941 |
| TH                                                                                    | Short sleep | middletemporal   | MR Egger                  | 18.0819 | 0.2584 |
| TH                                                                                    | Short sleep | middletemporal   | Inverse variance weighted | 18.1950 | 0.3126 |
| SA                                                                                    | Short sleep | middletemporal   | MR Egger                  | 10.7912 | 0.7024 |
| SA                                                                                    | Short sleep | middletemporal   | Inverse variance weighted | 11.6207 | 0.7075 |
| SA                                                                                    | Short sleep | lateraloccipital | MR Egger                  | 17.5468 | 0.2872 |
| SA                                                                                    | Short sleep | lateraloccipital | Inverse variance weighted | 17.6965 | 0.3420 |
| SA                                                                                    | morningness | cuneus           | MR Egger                  | 69.3552 | 0.1263 |
| SA                                                                                    | morningness | cuneus           | Inverse variance weighted | 69.5536 | 0.1424 |
| TH                                                                                    | morningness | frontalpole      | MR Egger                  | 49.9091 | 0.7359 |
| TH                                                                                    | morningness | frontalpole      | Inverse variance weighted | 50.0587 | 0.7615 |
| SA                                                                                    | morningness | lateraloccipital | MR Egger                  | 73.2774 | 0.0720 |
| SA                                                                                    | morningness | lateraloccipital | Inverse variance weighted | 73.4735 | 0.0828 |

|    |                    |                      |                           |         |        |
|----|--------------------|----------------------|---------------------------|---------|--------|
| TH | insomnia           | parahippocampal      | MR Egger                  | 6.7585  | 0.6622 |
| TH | insomnia           | parahippocampal      | Inverse variance weighted | 7.6764  | 0.6604 |
| SA | Long sleep         | isthmuscingulate     | MR Egger                  | 2.7453  | 0.4326 |
| SA | Long sleep         | isthmuscingulate     | Inverse variance weighted | 2.7643  | 0.5980 |
| SA | Long sleep         | parsopercularis      | MR Egger                  | 2.7502  | 0.4318 |
| SA | Long sleep         | parsopercularis      | Inverse variance weighted | 2.8355  | 0.5857 |
| SA | Ease of getting up | lateralorbitofrontal | MR Egger                  | 39.6765 | 0.1968 |
| SA | Ease of getting up | lateralorbitofrontal | Inverse variance weighted | 39.9775 | 0.2218 |

**Table S7. The heterogeneity (cochrane's Q) of the mr results of sleep traits and cortical SA/TH**

| The Pleiotropy of the mr results of sleep traits and cortical SA/TH |             |                  |                 |          |
|---------------------------------------------------------------------|-------------|------------------|-----------------|----------|
| cortical SA/TH                                                      | Outcome     | Exposure         | egger_intercept | Pval     |
| TH                                                                  | Short sleep | frontalpole      | 0.003029        | 0.224855 |
| TH                                                                  | Short sleep | superiortemporal | -0.000859       | 0.467251 |
| TH                                                                  | Short sleep | parahippocampal  | -0.000702       | 0.808923 |
| TH                                                                  | Short sleep | paracentral      | -0.000296       | 0.840811 |
| TH                                                                  | Short sleep | middletemporal   | -0.000397       | 0.763512 |
| SA                                                                  | Short sleep | middletemporal   | -3.047812       | 0.377833 |
| SA                                                                  | Short sleep | inferiorparietal | 5.500909        | 0.254200 |
| SA                                                                  | Short sleep | lateraloccipital | -1.778092       | 0.725543 |
| SA                                                                  | morningness | cuneus           | 0.374045        | 0.687865 |
| TH                                                                  | morningness | frontalpole      | 0.000490        | 0.700341 |
| SA                                                                  | morningness | lateraloccipital | 0.956443        | 0.697633 |
| TH                                                                  | insomnia    | parahippocampal  | -0.021637       | 0.363065 |
| SA                                                                  | Long sleep  | isthmuscingulate | 0.281168        | 0.899142 |

|    |            |                      |          |          |
|----|------------|----------------------|----------|----------|
| SA | Long sleep | lateralorbitofrontal | 0.946796 | 0.789191 |
|----|------------|----------------------|----------|----------|

**Table S8. The Pleiotropy of the mr results of sleep traits and cortical SA/TH**

Abbreviations: SA, Surficial area; TH, thickness.; IVs, Instrument variables; MR, Mendelian randomization; SNPs, Single-nucleotide polymorphisms.
