# Supplementary material for: Sleep Traits Causally Affect the Brain Cortical Structure: A Mendelian Randomization Study
Source: MDPI journal article supplement (doi:10.3390/biomedicines11082296), 2023-08-18
Supplement: s1 [file s1]

## Supplementary Information

# Sleep traits causally affect the brain cortical structure: A Mendelian randomization study

Yanjing Chen<sup>1</sup>, Shiyi Lyu<sup>1</sup>, Wang Xiao<sup>3</sup>, Sijie Yi<sup>1</sup>, Ping Liu<sup>1</sup>, Jun Liu<sup>1,2</sup>

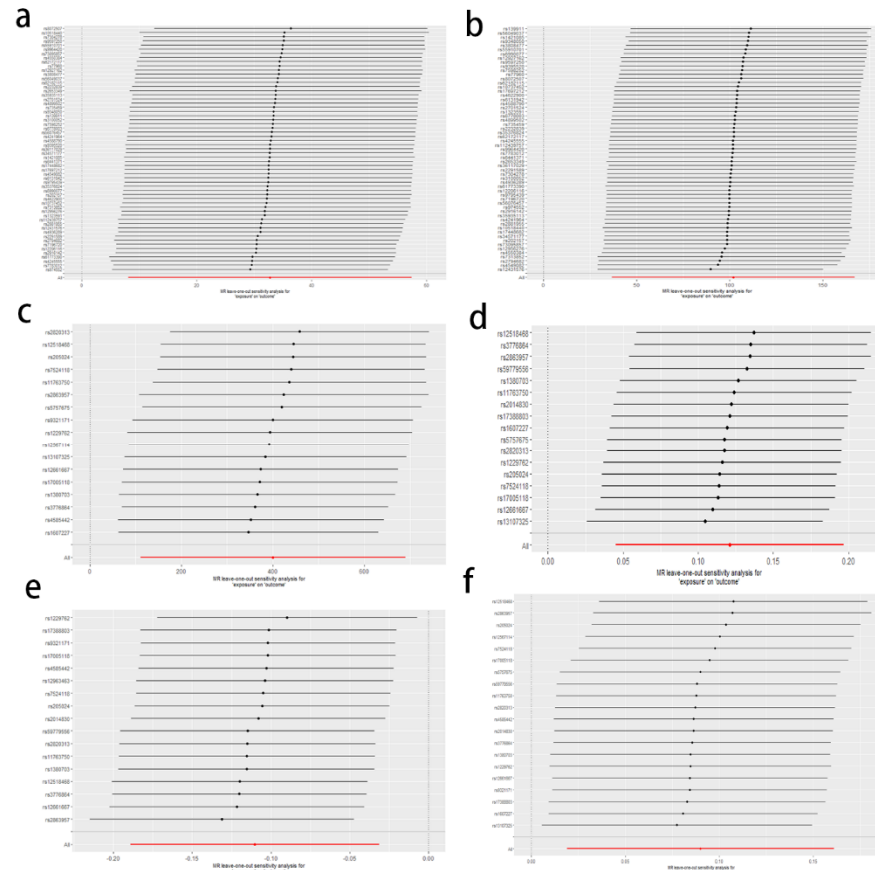

**Figure S1.** IVW estimates of stronger association results from morningness, long sleep, short sleep, ease of getting up and insomnia on cortical SA and TH with global weighted. (a) **Leave-one-out plots** from genetically predicted morningness on SA of the cuneus; (b) **Leave-one-out plots** from genetically predicted morningness on SA of the lateral occipital; (c) **Leave-one-out plots** from genetically predicted short sleep on SA of the lateral occipital; (d) **Leave-one-out plots** from genetically predicted short sleep on TH of the middle temporal; (e) **Leave-one-out plots** from genetically predicted short sleep on TH of paracentral; (f) **Leave-one-out plots** from genetically predicted short sleep on TH of parahippocampal.

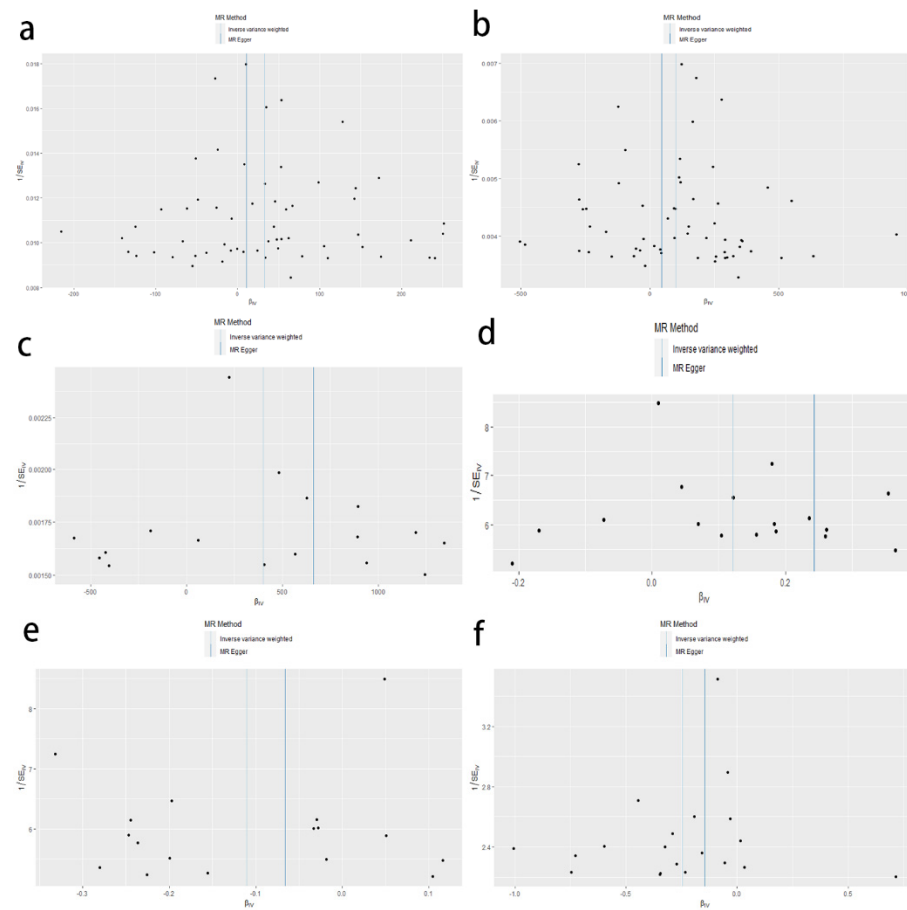

**Figure S2.** IVW estimates of stronger association results from morningness, long sleep, short sleep, ease of getting up and insomnia on cortical SA and TH with global weighted. (a) **Funnel plots** from genetically predicted morningness on SA of the cuneus; (b) **Funnel plots** from genetically predicted morningness on SA of the lateral occipital; (c) **Funnel plots** from genetically predicted short sleep on SA of the lateral occipital; (d) **Funnel plots** from genetically predicted short sleep on TH of the middle temporal; (e) **Funnel plots** from genetically predicted short sleep on TH of paracentral; (f) **Funnel plots** from genetically predicted short sleep on TH of parahippocampal.

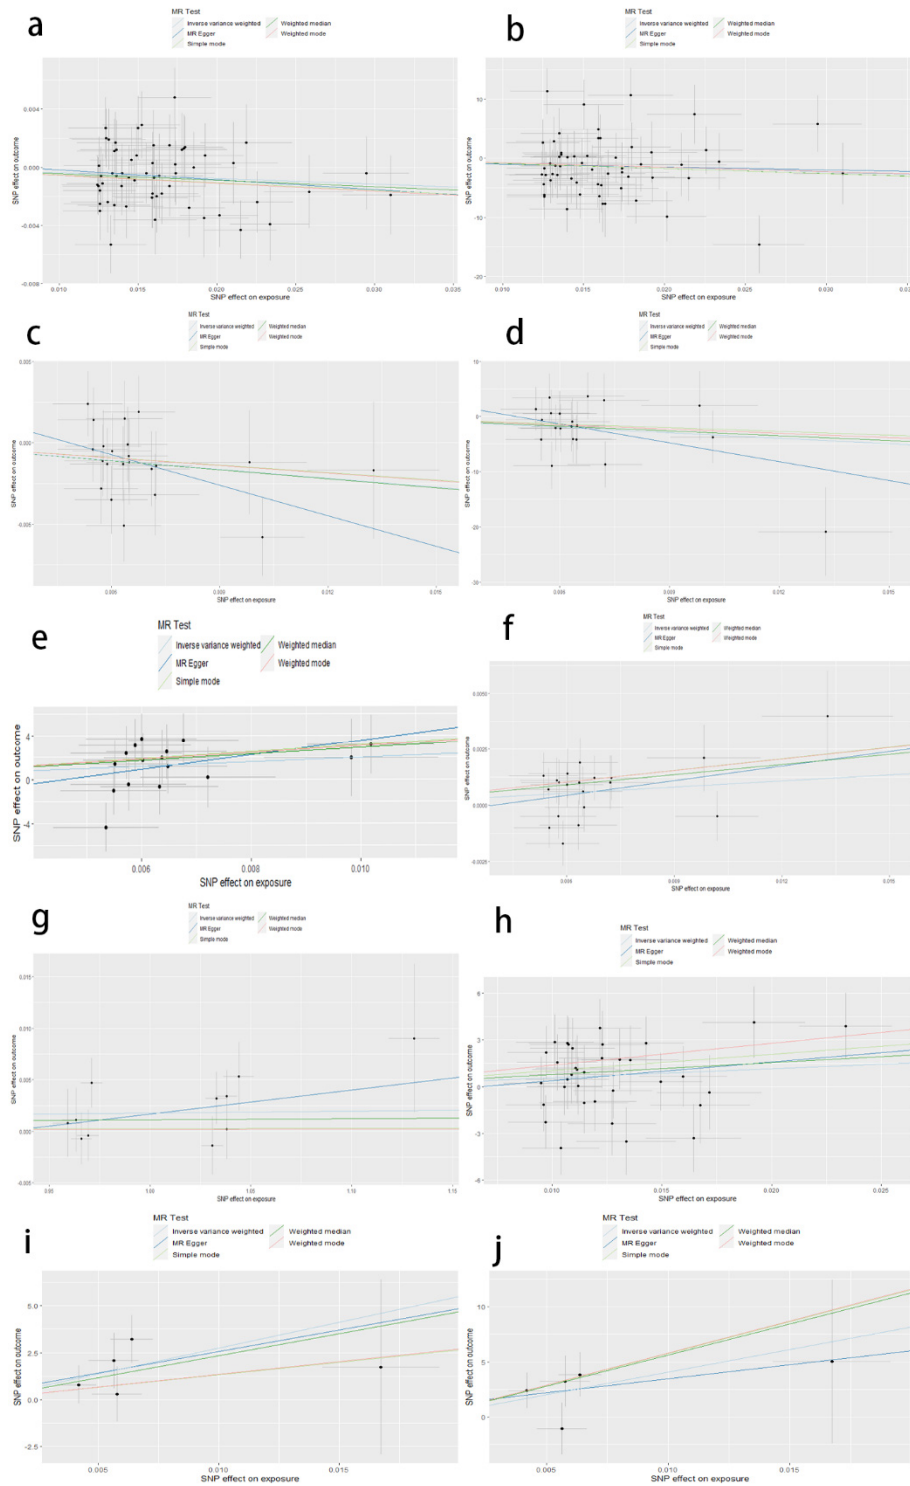

**FigureS3. Scatter plots** of stronger association and association estimates from genetically predicted (a) morningness on TH of the frontal pole with global weighted; (b) morningness on SA of the inferior parietal with global weighted; (c) short sleep on TH of the frontal pole with global weighted; (d) short sleep on SA of the inferior parietal with global weighted; (e) short sleep on SA of the middle temporal with global weighted; (f) short sleep on TH of the superior temporal with global weighted; (g) insomnia on TH of the parahippocampal with global weighted; (h) ease of getting up

on SA of the lateral orbitofrontal with global weighted; (i) long sleep on SA of isthmuscingulate with global weighted. (j) long sleep on SA of parsopercularis with global weighted.

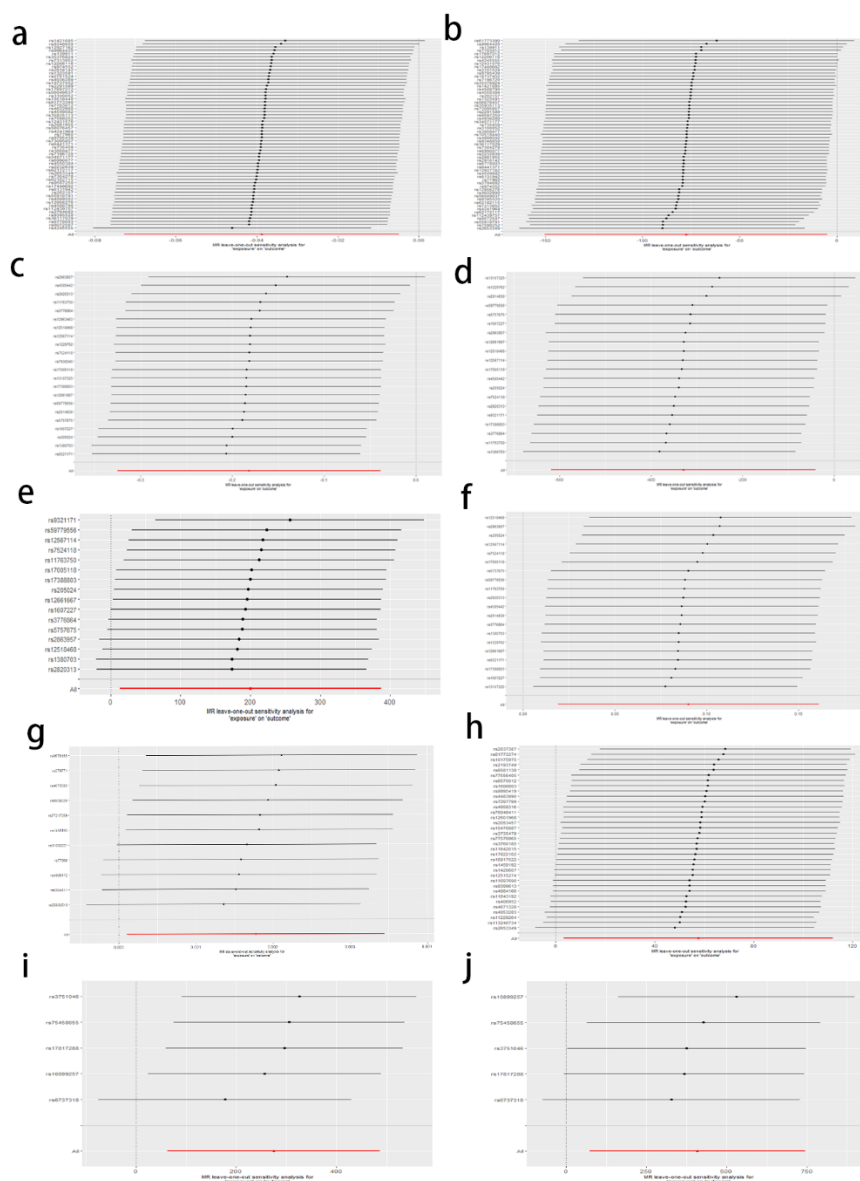

**FigureS4. Leave-one-out plots of stronger association and association estimates from genetically predicted(a) morningness on TH of the frontal pole with global weighted; (b) morningness on SA of the inferior parietal with global weighted; (c) short sleep on TH of the frontal pole with global weighted; (d) short sleep on SA of the inferior parietal with global weighted; (e) short sleep on SA of the middle temporal with global weighted; (f) short sleep on TH of the superior temporal with global weighted; (g) insomnia on TH of the parahippocampal with global weighted; (h) ease of getting up on SA of the lateral orbitofrontal with global weighted; (i) long sleep on SA of isthmuscingulate with global weighted. (j) long sleep on SA of parsopercularis with global weighted.**

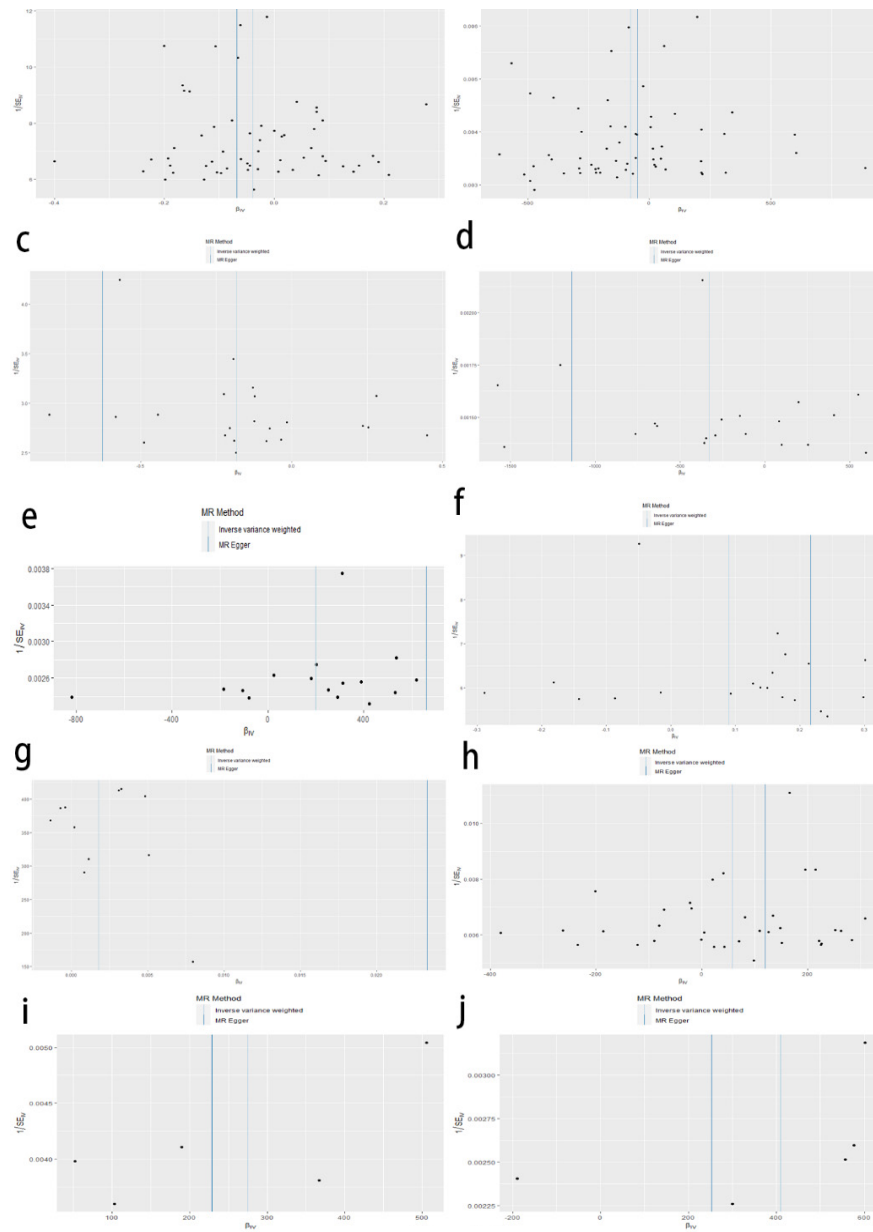

**FigureS5. Funnel plots** of stronger association and association estimates from genetically predicted (a) morningness on TH of the frontal pole with global weighted; (b) morningness on SA of the inferior parietal with global weighted; (c) short sleep on TH of the frontal pole with global weighted; (d) short sleep on SA of the inferior parietal with global weighted; (e) short sleep on SA of the middle temporal with global weighted; (f) short sleep on TH of the superior temporal with global weighted; (g) insomnia on TH of the parahippocampal with global weighted; (h) ease of getting up on SA of the lateral orbitofrontal with global weighted; (i) long sleep on SA of isthmuscingulate with global weighted. (j) long sleep on SA of parsopercularis with global weighted.
